# Supplementary material for: Deoxyfluorination of acyl fluorides to trifluoromethyl compounds by FLUOLEAD®/Olah’s reagent under solvent-free conditions
Source: publisher site journal article supplement (doi:10.3762/bjoc.16.254), 2020-12-14

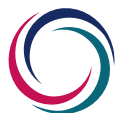

## Supporting Information

for

### **Deoxyfluorination of acyl fluorides to trifluoromethyl compounds by FLUOLEAD<sup>®</sup>/Olah's reagent under solvent-free conditions**

Yumeng Liang, Akihito Taya, Zhengyu Zhao, Norimichi Saito and Norio Shibata

*Beilstein J. Org. Chem.* **2020**, *16*, 3052–3058. [doi:10.3762/bjoc.16.254](https://doi.org/10.3762/bjoc.16.254)

### **Optimization of the reaction conditions, general procedure and product characterization data**

## 1. General Information.

All reagents were used as received from commercial sources, unless specified otherwise. All reactions were performed in narrow-mouth FEP tube (Nalgene®). All reactions were monitored by thin-layer chromatography (TLC) carried out on 0.25 mm Merck silica-gel (60-F254). The TLC plates were visualized with UV light (254 nm) and potassium permanganate or *p*-anisaldehyde in ethanol/heat. Purification of reaction products was carried out by column chromatography with silica-gel 60N spherical neutral size 63-210  $\mu\text{m}$  or 40-63  $\mu\text{m}$ . Unless otherwise specified, the  $^1\text{H}$ -NMR (300 MHz and 700 MHz),  $^{19}\text{F}$ -NMR (282 MHz),  $^{13}\text{C}$ -NMR (90 MHz, 126 MHz and 176 MHz) spectra for solution in  $\text{CDCl}_3$  were recorded on a Bruker Avance 500, Varian Mercury 300, JEOL ECZ700R. Chemical shifts ( $\delta$ ) are expressed in ppm downfield from tetramethylsilane ( $\delta\text{H} = 0.00$  ppm) or  $\text{CDCl}_3$  ( $\delta\text{C} = 77.0$  ppm) or hexafluorobenzene ( $\delta\text{F} = -162.20$  ppm). Mass spectra was recorded on a JEOL JMS-Q1050GC Master-Quad GC/MS (EI-MS) and SHIMADZU LCMS-2020 (ESI-MS). High resolution mass spectrometry (HRMS) was recorded on a Waters, GCT Premier (EI-MS) with a TOF analyzer and Waters Synapt G2 HDMS (ESI-MS). The wave numbers ( $\nu$ ) of recorded IR-signals are quoted in  $\text{cm}^{-1}$  on a JASCO FT/IR-4100 spectrometer. Melting point was recorded on a BUCHI M-565. All solvents were dried and distilled before use.

## 2. Optimization of Reaction Conditions.

**Table S1.** Optimization of reaction condition with **2a**.

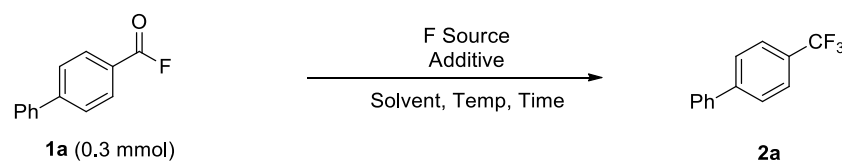

O=C(F)c1ccc(cc1)C2=CC=CC=C2
 $\xrightarrow[\text{Solvent, Temp, Time}]{\text{F Source Additive}}$ 
FC(F)(F)c1ccc(cc1)C2=CC=CC=C2

**1a** (0,3 mmol) **2a**

| Entry           | [F] Source<br>(x equiv) | Additive<br>(y equiv)                  | Solvent<br>(z mL) | Temp.<br>(°C) | Time<br>(h) | Yield<br>(%) <sup>a</sup> |
|-----------------|-------------------------|----------------------------------------|-------------------|---------------|-------------|---------------------------|
| 1               | DAST (3)                | -                                      | MeCN (1)          | RT            | 24          | ND                        |
| 2               | Fluolead (3)            | -                                      | MeCN (1)          | RT            | 24          | ND                        |
| 3               | nHF·pyridine (2)        | -                                      | MeCN (1)          | RT            | 24          | ND                        |
| 4               | DAST (3)                | -                                      | MeCN (1)          | 80            | 24          | 3                         |
| 5               | Fluolead (3)            | -                                      | MeCN (1)          | 80            | 24          | ND                        |
| 6               | nHF·pyridine (2)        | -                                      | MeCN (1)          | 80            | 24          | ND                        |
| 7               | DAST (3)                | -                                      | MeCN (1)          | 80            | 48          | 25                        |
| 8               | Fluolead (3)            | nHF·pyridine (3)                       | neat              | 70            | 24          | 75                        |
| 9               | Fluolead (3)            | nHF·pyridine (1)                       | neat              | 70            | 24          | 26                        |
| 10              | Fluolead (3)            | nHF·pyridine (2)                       | neat              | 70            | 24          | 20                        |
| 11              | Fluolead (3)            | nHF·pyridine (4)                       | neat              | 70            | 24          | 90                        |
| 12              | Fluolead (3)            | nHF·pyridine (5)                       | neat              | 70            | 24          | >99(91)                   |
| 13              | Fluolead (3)            | -                                      | neat              | 70            | 24          | ND                        |
| 14              | Fluolead (2)            | nHF·pyridine (5)                       | neat              | 70            | 24          | 65                        |
| 15 <sup>b</sup> | Fluolead (1.5)          | nHF·pyridine (5)                       | neat              | 70            | 24          | 63                        |
| 16              | Fluolead (1)            | nHF·pyridine (5)                       | neat              | 70            | 24          | 53                        |
| 17              | Fluolead (0.7)          | nHF·pyridine (5)                       | neat              | 70            | 24          | 36                        |
| 18              | -                       | nHF·pyridine (5)                       | neat              | 70            | 24          | ND                        |
| 19              | Fluolead (3)            | Et <sub>3</sub> N(HF) <sub>3</sub> (5) | neat              | 70            | 24          | 37                        |
| 20              | DAST (3)                | nHF·pyridine (5)                       | neat              | 70            | 24          | 25                        |
| 21              | DeoxoFluor (3)          | nHF·pyridine (5)                       | neat              | 70            | 24          | ND                        |
| 22              | Xtalfluor-M (3)         | nHF·pyridine (5)                       | neat              | 70            | 24          | ND                        |
| 23              | TBAT (3)                | nHF·pyridine (5)                       | neat              | 70            | 24          | ND                        |
| 24              | Fluolead (3)            | nHF·pyridine (5)                       | MeCN (1)          | 70            | 24          | ND                        |

|    |              |                  |             |     |    |    |
|----|--------------|------------------|-------------|-----|----|----|
| 25 | Fluolead (3) | nHF·pyridine (5) | DMF (1)     | 70  | 24 | ND |
| 26 | Fluolead (3) | nHF·pyridine (5) | THF (1)     | 70  | 24 | ND |
| 27 | Fluolead (3) | nHF·pyridine (5) | toluene (1) | 70  | 24 | 65 |
| 28 | Fluolead (3) | nHF·pyridine (5) | DCM (1)     | 70  | 24 | 26 |
| 29 | Fluolead (3) | nHF·pyridine (5) | neat        | 70  | 17 | 55 |
| 30 | Fluolead (3) | nHF·pyridine (5) | neat        | 70  | 3  | 22 |
| 31 | Fluolead (3) | nHF·pyridine (5) | neat        | 70  | 1  | 9  |
| 32 | Fluolead (3) | nHF·pyridine (5) | neat        | 40  | 24 | 9  |
| 33 | Fluolead (3) | nHF·pyridine (5) | neat        | 50  | 24 | 68 |
| 34 | Fluolead (3) | nHF·pyridine (5) | neat        | 100 | 24 | 85 |

Standard conditons: **1a** (0.3 mmol), [F] source and Additive in solvent or neat. <sup>a</sup> Determined by <sup>19</sup>F NMR spectroscopy. The numbers in parentheses refer to the isolated yield.

### 3. General Procedure and Product Characterization Data for Trifluoromethyl Compounds 2.

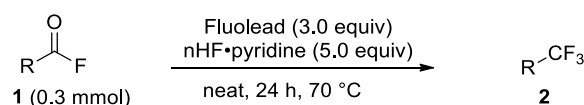

**Scheme S1.** General procedure for trifluoromethyl compounds **2** from acyl fluoride **1**.

#### General procedure:

An oven-dried narrow-mouth FEP tube (Nalgene®) (10.0 mL) containing a magnetic stir bar was charged with **1** (0.3 mmol), Fluolead (225.3 mg, 0.9 mmol, 3.0 equiv.) and nHF·Pyridine complex (HF 70%, pyridine 30%, 1.5 mmol, 5.0 equiv., neat). The tube was tightly sealed then stirred at 70 °C for 24 hours. Then, the mixtures were cooled down to room temperature and ethanol (3.0 mL) was added to the mixtures stirring for additional 30 min at room temperature. Then, the mixtures were added to 1 M aqueous NaHCO<sub>3</sub> (3 mL) at 0 °C, extracted with Et<sub>2</sub>O (3 x 5mL) and the combined organic layer was dried over anhydrous Na<sub>2</sub>SO<sub>4</sub>, filtered and concentrated under reduced pressure. The yield was determined by <sup>19</sup>F NMR analysis of the crude mixture by using C<sub>6</sub>H<sub>5</sub>OCF<sub>3</sub> (40.0 μL, 0.3 mmol, 1.0 equiv.) as an internal standard. Unless specifically mentioned, the residue was purified by silica gel flash chromatography (*n*-Hexane) to afford the title compound.

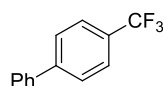

#### 4-(Trifluoromethyl)-1,1'-biphenyl (**2a**).

Following the general procedure, using substrate **1a** (0.3 mmol, 1.0 equiv), Fluolead (225.3 mg, 0.9 mmol, 3.0 equiv.) and nHF·Pyridine complex (HF 70%, pyridine 30%, 1.5 mmol, 5.0 equiv., neat), the reaction mixture was stirred at 70 °C for 24 hours. The yield (>99%) was determined by <sup>19</sup>F NMR of the crude reaction mixture.

The crude mixture was purified by column chromatography (*n*-Hexane) to afford the title compound **2a** (60.7 mg, 91% yield) as a white solid.

**<sup>1</sup>H NMR** (300 MHz, CDCl<sub>3</sub>) δ: 7.70 – 7.69 (m, 4H), 7.62 – 7.58 (m, 2H), 7.50 – 7.38 (m, 3H) ppm. **<sup>19</sup>F NMR** (282 MHz, CDCl<sub>3</sub>) δ: -62.88 (s, 3F) ppm. **MS (EI)**: *m/z* 222 [M]<sup>+</sup>. Spectroscopic data was agreement with the literature.<sup>1</sup>

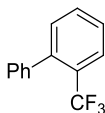

#### 2-(Trifluoromethyl)-1,1'-biphenyl (**2b**).

Following the general procedure, using substrate **1b** (0.3 mmol, 1.0 equiv), Fluolead (225.3 mg, 0.9 mmol, 3.0 equiv.) and nHF·Pyridine complex (HF 70%, pyridine 30%, 1.5 mmol, 5.0 equiv., neat), the reaction mixture was stirred at 70 °C for 24 hours. The yield (95%) was determined by <sup>19</sup>F NMR of the crude reaction mixture. The crude mixture was purified by column chromatography (*n*-Hexane) to afford the title compound **2b** (52.0 mg, 78% yield) as a white solid.

**<sup>1</sup>H NMR** (300 MHz, CDCl<sub>3</sub>) δ: 7.75 (d, *J* = 7.6 Hz, 1H), 7.58 – 7.53 (m, 1H), 7.49 – 7.44 (m, 1H), 7.41–7.39 (m, 3H), 7.34 – 7.31 (m, 3H) ppm. **<sup>19</sup>F NMR** (282 MHz, CDCl<sub>3</sub>) δ: -57.3 (s, 3F) ppm. **MS (EI)**: *m/z* 222 [M]<sup>+</sup>. Spectroscopic data was agreement with the literature.<sup>1</sup>

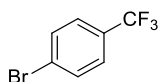

#### 1-Bromo-4-(trifluoromethyl)benzene (**2c**).

Following the general procedure, using substrate **1c** (0.3 mmol, 1.0 equiv), Fluolead (225.3 mg, 0.9 mmol, 3.0 equiv.) and nHF·Pyridine complex (HF 70%, pyridine 30%, 1.5 mmol, 5.0 equiv., neat), the reaction mixture was stirred at 70 °C for 24 hours. The yield (75%) was determined by <sup>19</sup>F NMR of the crude reaction mixture. The crude mixture was purified by column chromatography (*n*-Hexane) to afford the title compound **2c** (43.1 mg, 64% yield) as a colorless oil.

**<sup>1</sup>H NMR** (300 MHz, CDCl<sub>3</sub>) δ: 7.64 (d, *J* = 7.3 Hz, 2H), 7.50 (d, *J* = 6.8 Hz, 2H) ppm. **<sup>19</sup>F NMR** (282 MHz, CDCl<sub>3</sub>) δ: -63.04 (s, 3F) ppm. **MS (EI)**: *m/z* 224 [M]<sup>+</sup>. Spectroscopic data was agreement with the literature.<sup>2</sup>

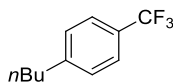

#### 1-Butyl-4-(trifluoromethyl)benzene (**2d**).

Following the general procedure, using substrate **1d** (0.3 mmol, 1.0 equiv), Fluolead (225.3 mg, 0.9 mmol, 3.0 equiv.) and nHF·Pyridine complex (HF 70%, pyridine 30%, 1.5 mmol, 5.0 equiv., neat), the reaction mixture was stirred at 70 °C for 24 hours. The yield (54%) was determined by <sup>19</sup>F NMR of the crude reaction mixture. The crude mixture was purified by column chromatography (*n*-Hexane) to afford the title compound **2d** (21.8 mg, 36% yield) as a colorless oil.

**<sup>1</sup>H NMR** (300 MHz, CDCl<sub>3</sub>) δ: 7.52 (d, *J* = 8.0 Hz, 2H), 7.28 (d, *J* = 7.8 Hz, 2H), 2.66 (t, *J* = 7.7 Hz, 2H), 1.66 – 1.54 (m, 2H), 1.39 – 1.32 (m, 2H), 0.93 (t, *J* = 7.3 Hz, 3H) ppm. **<sup>19</sup>F NMR** (282 MHz, CDCl<sub>3</sub>) δ: -62.72 (s, 3F) ppm. **MS** (EI): *m/z* 202 [M]<sup>+</sup>. Spectroscopic data was agreement with the literature.<sup>3</sup>

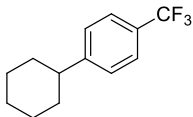

**1-Cyclohexyl-4-(trifluoromethyl)benzene (2e).**

Following the general procedure, using substrate **1e** (0.3 mmol, 1.0 equiv), Fluolead (225.3 mg, 0.9 mmol, 3.0 equiv.) and nHF·Pyridine complex (HF 70%, pyridine 30%, 1.5 mmol, 5.0 equiv., neat), the reaction mixture was stirred at 70 °C for 24 hours. The yield (89%) was determined by <sup>19</sup>F NMR of the crude reaction mixture. The crude mixture was purified by column chromatography (*n*-Hexane) to afford the title compound **2e** (49.1 mg, 72% yield) as a colorless oil.

**<sup>1</sup>H NMR** (300 MHz, CDCl<sub>3</sub>) δ: 7.54 (d, *J* = 8.0 Hz, 2H), 7.31 (d, *J* = 8.0 Hz, 2H), 2.60 – 2.52 (m, 1H), 1.89 – 1.84 (m, 4H), 1.79 – 1.74 (m, 1H), 1.49 – 1.38 (m, 4H), 1.33 – 1.22 (m, 1H) ppm. **<sup>19</sup>F NMR** (282 MHz, CDCl<sub>3</sub>) δ: -62.73 (s, 3F) ppm. **MS** (EI): *m/z* 228 [M]<sup>+</sup>. Spectroscopic data was agreement with the literature.<sup>4</sup>

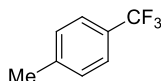

**1-Methyl-4-(trifluoromethyl)benzene (2f).**

Following the general procedure, using substrate **1f** (0.3 mmol, 1.0 equiv), Fluolead (225.3 mg, 0.9 mmol, 3.0 equiv.) and nHF·Pyridine complex (HF 70%, pyridine 30%, 1.5 mmol, 5.0 equiv., neat), the reaction mixture was stirred at 70 °C for 24 hours. The yield (87%) was determined by <sup>19</sup>F NMR of the crude reaction mixture. The crude mixture was purified by column chromatography (*n*-Hexane) to afford the title compound **2f** (23.6 mg, 49% yield) as a colorless oil.

**<sup>1</sup>H NMR** (300 MHz, CDCl<sub>3</sub>) δ: 8.19 (d, *J* = 8.2 Hz, 2H), 7.82 (d, *J* = 8.1 Hz, 2H), 2.41 (s, 3H) ppm. **<sup>19</sup>F NMR** (282 MHz, CDCl<sub>3</sub>) δ: -63.09 (s, 3F) ppm. **MS** (EI): *m/z* 192 [M]<sup>+</sup>. Spectroscopic data was agreement with the literature.<sup>1</sup>

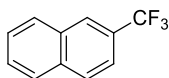

**2-(Trifluoromethyl)naphthalene (2g).**

Following the general procedure, using substrate **1g** (0.3 mmol, 1.0 equiv), Fluolead (225.3 mg, 0.9 mmol, 3.0 equiv.) and nHF·Pyridine complex (HF 70%, pyridine 30%, 1.5 mmol, 5.0 equiv., neat), the reaction mixture was stirred at 70 °C for 24 hours. The yield (>99%) was determined by <sup>19</sup>F NMR of the crude reaction mixture. The crude mixture was purified by column chromatography (*n*-Hexane) to afford the title compound **2g** (41.2 mg, 70% yield) as a white solid.

**<sup>1</sup>H NMR** (300 MHz, CDCl<sub>3</sub>) δ: 8.16 (s, 1H), 7.97 – 7.90 (m, 3H), 7.66 – 7.56 (m, 3H) ppm. **<sup>19</sup>F NMR** (282

MHz, CDCl<sub>3</sub>)  $\delta$ : -62.76 (s, 3F) ppm. **MS** (EI):  $m/z$  196 [M]<sup>+</sup>. Spectroscopic data was agreement with the literature.<sup>2</sup>

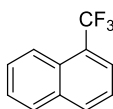

**1-(Trifluoromethyl)naphthalene (2h).**

Following the general procedure, using substrate **1h** (0.3 mmol, 1.0 equiv), Fluolead (225.3 mg, 0.9 mmol, 3.0 equiv.) and nHF·Pyridine complex (HF 70%, pyridine 30%, 1.5 mmol, 5.0 equiv., neat), the reaction mixture was stirred at 70 °C for 24 hours. The yield (>99%) was determined by <sup>19</sup>F NMR of the crude reaction mixture. The crude mixture was purified by column chromatography (*n*-Hexane) to afford the title compound **2h** (36.8 mg, 63% yield) as a colorless oil.

**<sup>1</sup>H NMR** (300 MHz, CDCl<sub>3</sub>)  $\delta$ : 8.20 (d,  $J$  = 8.5 Hz, 1H), 8.03 (d,  $J$  = 8.4 Hz, 1H), 7.90 (q,  $J$  = 15.9, 7.5 Hz, 2H), 7.66 – 7.48 (m, 3H) ppm. **<sup>19</sup>F NMR** (282 MHz, CDCl<sub>3</sub>)  $\delta$ : -60.25 (s, 3F) ppm. **MS** (EI):  $m/z$  196 [M]<sup>+</sup>. Spectroscopic data was agreement with the literature.<sup>1</sup>

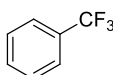

**(Trifluoromethyl)benzene (2i).**

Following the general procedure, using substrate **1i** (0.3 mmol, 1.0 equiv), Fluolead (225.3 mg, 0.9 mmol, 3.0 equiv.) and nHF·Pyridine complex (HF 70%, pyridine 30%, 1.5 mmol, 5.0 equiv., neat), the reaction mixture was stirred at 70 °C for 24 hours. The yield (>99%) was determined by <sup>19</sup>F NMR of the crude reaction mixture. The crude mixture was purified by kugelrohr distillation to afford the title compound **2i** (14.5 mg, 33% yield) as a colorless oil.

**<sup>1</sup>H NMR** (300 MHz, CDCl<sub>3</sub>)  $\delta$ : 7.64 – 7.61 (m, 2H), 7.58 – 7.45 (m, 3H). **<sup>19</sup>F NMR** (282 MHz, CDCl<sub>3</sub>)  $\delta$ : -63.20 (s, 3F) ppm. **MS** (EI):  $m/z$  146 [M]<sup>+</sup>. Spectroscopic data was agreement with the literature.<sup>5</sup>

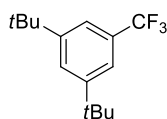

**1,3-Di-tert-butyl-5-(trifluoromethyl)benzene (2j).**

Following the general procedure, using substrate **1j** (0.3 mmol, 1.0 equiv), Fluolead (225.3 mg, 0.9 mmol, 3.0 equiv.) and nHF·Pyridine complex (HF 70%, pyridine 30%, 1.5 mmol, 5.0 equiv., neat), the reaction mixture was stirred at 70 °C for 24 hours. The yield (92%) was determined by <sup>19</sup>F NMR of the crude reaction mixture. The crude mixture was purified by column chromatography (*n*-Hexane) to afford the title compound **2j** (32.8 mg, 42% yield) as a white solid.

**<sup>1</sup>H NMR** (300 MHz, CDCl<sub>3</sub>)  $\delta$ : 7.59 (s, 1H), 7.44 (s, 2H), 1.34 (s, 18H) ppm. **<sup>19</sup>F NMR** (282 MHz, CDCl<sub>3</sub>)  $\delta$ : -62.60 (s, 3F) ppm. **<sup>13</sup>C NMR** (176 MHz, CDCl<sub>3</sub>)  $\delta$ : 151.60, 129.91 (q,  $J$  = 31.1 Hz), 124.71 (q,  $J$  = 272.2 Hz), 125.79, 119.27 (q,  $J$  = 3.3 Hz), 35.02, 31.30 ppm. **<sup>19</sup>F NMR** (282 MHz, CDCl<sub>3</sub>)  $\delta$ : -62.60 (s, 3F) ppm. **HRMS**

(EI) calculated for  $C_{15}H_{21}F_3$   $[M]^+$ : 258.1595 found 258.1601. **IR (KBr)**: 2967, 2869, 1477, 1342, 1261, 1126, 884  $cm^{-1}$ . **m.p.**: 36.2 – 36.9 °C.

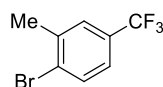

**1-Bromo-2-methyl-4-(trifluoromethyl)benzene (2k).**

Following the general procedure, using substrate **1k** (0.3 mmol, 1.0 equiv), Fluolead (225.3 mg, 0.9 mmol, 3.0 equiv.) and nHF·Pyridine complex (HF 70%, pyridine 30%, 1.5 mmol, 5.0 equiv., neat), the reaction mixture was stirred at 70 °C for 24 hours. The yield (>99%) was determined by  $^{19}F$  NMR of the crude reaction mixture. The crude mixture was purified by column chromatography (*n*-Hexane) to afford the title compound **2k** (22.0 mg, 31% yield) as a colorless oil.

**$^1H$  NMR** (300 MHz,  $CDCl_3$ )  $\delta$ : 7.65 (d,  $J$  = 8.4 Hz, 1H), 7.49 (s, 1H), 7.31 (d,  $J$  = 8.5 Hz, 1H), 2.46 (s, 3H) ppm.  **$^{19}F$  NMR** (282 MHz,  $CDCl_3$ )  $\delta$ : -63.17 (s, 3F) ppm. **MS** (EI):  $m/z$  238  $[M]^+$ . Spectroscopic data was agreement with the literature. <sup>6</sup>

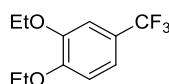

**1,2-Diethoxy-4-(trifluoromethyl)benzene (2l).**

Following the general procedure, using substrate **1l** (0.3 mmol, 1.0 equiv), Fluolead (225.3 mg, 0.9 mmol, 3.0 equiv.) and nHF·Pyridine complex (HF 70%, pyridine 30%, 1.5 mmol, 5.0 equiv., neat), the reaction mixture was stirred at 70 °C for 24 hours. The yield (66%) was determined by  $^{19}F$  NMR of the crude reaction mixture. The crude mixture was purified by column chromatography (*n*-Hexane/  $Et_2O$  = 5/1) to afford the title compound **2l** (10.9 mg, 16% yield) as a colorless oil.

**$^1H$  NMR** (300 MHz,  $CDCl_3$ )  $\delta$ : 7.17 (d,  $J$  = 8.8 Hz, 1H), 7.08 (s, 1H), 6.91 (d,  $J$  = 8.4 Hz, 1H), 4.13 (qd,  $J$  = 7.0, 3.7 Hz, 4H), 1.48 (t,  $J$  = 7.0 Hz, 6H) ppm.  **$^{19}F$  NMR** (282 MHz,  $CDCl_3$ )  $\delta$ : -62.00 (s, 3F) ppm. **MS** (EI):  $m/z$  234  $[M]^+$ . Spectroscopic data was agreement with the literature. <sup>7</sup>

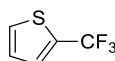

**2-(Trifluoromethyl)thiophene (2m).**

Following the general procedure, using substrate **1m** (0.3 mmol, 1.0 equiv), Fluolead (225.3 mg, 0.9 mmol, 3.0 equiv.) and nHF·Pyridine complex (HF 70%, pyridine 30%, 1.5 mmol, 5.0 equiv., neat), the reaction mixture was stirred at 70 °C for 24 hours. The yield (52%) was determined by  $^{19}F$  NMR of the crude reaction mixture. The crude mixture was purified by kugelrohr distillation to afford the title compound **2m** (6.0 mg, 13% yield) as a colorless oil.

**$^1H$  NMR** (300 MHz,  $CDCl_3$ )  $\delta$ : 7.51 (d,  $J$  = 5.1 Hz, 1H), 7.46 (d,  $J$  = 3.4 Hz, 1H), 7.09 (s, 1H) ppm.  **$^{19}F$  NMR** (282 MHz,  $CDCl_3$ )  $\delta$ : -55.44 (s, 3F) ppm. **MS** (EI):  $m/z$  152  $[M]^+$ . Spectroscopic data was agreement with the literature. <sup>1</sup>



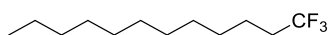

**1,1,1-Trifluorododecane (2n).**

Following the general procedure, using substrate **1n** (0.3 mmol, 1.0 equiv), Fluolead (225.3 mg, 0.9 mmol, 3.0 equiv.) and nHF·Pyridine complex (HF 70%, pyridine 30%, 1.5 mmol, 5.0 equiv., neat), the reaction mixture was stirred at 70 °C for 24 hours. The yield (93%) was determined by <sup>19</sup>F NMR of the crude reaction mixture. The crude mixture was purified by column chromatography (*n*-Hexane) to afford the title compound **2n** (32.3 mg, 48% yield) as a colorless oil.

<sup>1</sup>H NMR (300 MHz, CDCl<sub>3</sub>) δ: 2.12 – 2.01 (m, 2H), 1.60 – 1.50 (m, 2H), 1.30 – 1.27 (m, 16H), 0.92 – 0.86 (m, 3H) ppm. <sup>19</sup>F NMR (282 MHz, CDCl<sub>3</sub>) δ: -66.91 (s, 3F) ppm. MS (EI): *m/z* 224 [M]<sup>+</sup>. Spectroscopic data was agreement with the literature.<sup>8</sup>

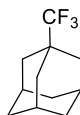

**1-Trifluoromethyladamantane (2o).**

Following the general procedure, using substrate **1o** (0.3 mmol, 1.0 equiv), Fluolead (225.3 mg, 0.9 mmol, 3.0 equiv.) and nHF·Pyridine complex (HF 70%, pyridine 30%, 1.5 mmol, 5.0 equiv., neat), the reaction mixture was stirred at 70 °C for 24 hours. The yield (62%) was determined by <sup>19</sup>F NMR of the crude reaction mixture. The crude mixture was purified by column chromatography (*n*-Hexane) to afford the title compound **2o** (19.0 mg, 31% yield) as a colorless oil.

<sup>1</sup>H NMR (300 MHz, CDCl<sub>3</sub>) δ: 2.06 – 2.04 (m, 3H), 1.78 – 1.65 (m, 12H) ppm. <sup>19</sup>F NMR (282 MHz, CDCl<sub>3</sub>) δ: -83.49 (s, 3F) ppm. MS (EI): *m/z* 204 [M]<sup>+</sup>. Spectroscopic data was agreement with the literature.<sup>9</sup>

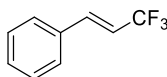

**(E)-1-Phenyl-3,3,3-trifluoroprop-1-ene (2p).**

Following the general procedure, using substrate **1p** (0.3 mmol, 1.0 equiv), Fluolead (225.3 mg, 0.9 mmol, 3.0 equiv.) and nHF·Pyridine complex (HF 70%, pyridine 30%, 1.5 mmol, 5.0 equiv., neat), the reaction mixture was stirred at 70 °C for 24 hours. The yield (73%) was determined by <sup>19</sup>F NMR of the crude reaction mixture. The crude mixture was purified by column chromatography (*n*-Hexane) to afford the title compound **2p** (14.5 mg, 28% yield) as a colorless oil.

<sup>1</sup>H NMR (300 MHz, CDCl<sub>3</sub>) δ: 7.48 – 7.43 (m, 2H), 7.40 – 7.38 (m, 3H), 7.15 (dq, *J* = 16.2, 2.0 Hz, 1H), 6.21 (dq, *J* = 16.1, 6.5 Hz, 1H) ppm. <sup>19</sup>F NMR (282 MHz, CDCl<sub>3</sub>) δ: -63.81 (d, *J* = 6.4 Hz, 3F) ppm. MS (EI): *m/z* 172 [M]<sup>+</sup>. Spectroscopic data was agreement with the literature.<sup>10</sup>

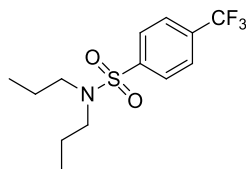

***N,N*-Dipropyl-4-(trifluoromethyl)benzenesulfonamide (2q).**

Following the general procedure, using substrate **1q** (0.3 mmol, 1.0 equiv), Fluolead (225.3 mg, 0.9 mmol, 3.0 equiv.) and nHF·Pyridine complex (HF 70%, pyridine 30%, 1.5 mmol, 5.0 equiv., neat), the reaction mixture was stirred at 70 °C for 24 hours. The yield (97%) was determined by <sup>19</sup>F NMR of the crude reaction mixture. The crude mixture was purified by column chromatography (*n*-Hexane/EtOAc = 10/1) to afford the title compound **2q** (70.5 mg, 76% yield) as an orange solid.

<sup>1</sup>H NMR (300 MHz, CDCl<sub>3</sub>) δ: 7.94 (d, *J* = 8.3 Hz, 2H), 7.77 (d, *J* = 8.2 Hz, 2H), 3.11 (t, *J* = 7.8 Hz, 4H), 1.63 – 1.50 (m, 4H), 0.88 (t, *J* = 7.4 Hz, 6H) ppm. <sup>19</sup>F NMR (282 MHz, CDCl<sub>3</sub>) δ: -63.51 (s, 3F) ppm. MS (ESI): *m/z* 310 [M + H]<sup>+</sup>. Spectroscopic data was agreement with the literature.<sup>8</sup>

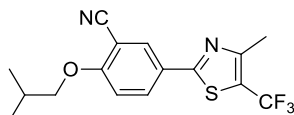

**2-Isobutoxy-5-(4-methyl-5-(trifluoromethyl)thiazol-2-yl)benzonitrile (2r).**

Following the general procedure, using substrate **1r** (0.3 mmol, 1.0 equiv), Fluolead (225.3 mg, 0.9 mmol, 3.0 equiv.) and nHF·Pyridine complex (HF 70%, pyridine 30%, 1.5 mmol, 5.0 equiv., neat), the reaction mixture was stirred at 100 °C for 24 hours. The yield (73%) was determined by <sup>19</sup>F NMR of the crude reaction mixture. The crude mixture was purified by column chromatography (*n*-Hexane/EtOAc = 10/1) to afford the title compound **2r** (45.9 mg, 45% yield) as a yellow solid.

<sup>1</sup>H NMR (300 MHz, CDCl<sub>3</sub>) δ: 8.14 (d, *J* = 1.7 Hz, 1H), 8.04 (dd, *J* = 8.8, 1.8 Hz, 1H), 7.02 (d, *J* = 8.9 Hz, 1H), 3.90 (d, *J* = 6.4 Hz, 2H), 2.59 (s, 3H), 2.25 – 2.17 (m, 1H), 1.11 (s, 3H), 1.08 (s, 3H) ppm. <sup>13</sup>C NMR (126 MHz, CDCl<sub>3</sub>) δ: 165.7, 162.5, 155.4 (q, *J* = 2.5 Hz), 132.4, 131.9, 125.7, 122.4 (q, *J* = 269.4 Hz), 119.7 (q, *J* = 37.3 Hz), 115.3, 112.6, 103.0, 75.7, 28.1, 19.0, 16.1 ppm. <sup>19</sup>F NMR (282 MHz, CDCl<sub>3</sub>) δ: -53.38 (s, 3F) ppm. HRMS (ESI) calculated for C<sub>16</sub>H<sub>16</sub>N<sub>2</sub>F<sub>3</sub>OS [M + H]<sup>+</sup>: 341.0935 found 341.0922. IR (KBr): 2960, 2881, 2224, 1612, 1514, 1459, 1382, 1349, 1279, 1169, 1121, 1020, 823, 444, 404 cm<sup>-1</sup>. m.p.: 107.0-108.0 °C.

**4. 1 Gram scale of 1a**

An oven-dried narrow-mouth FEP tube (Nalgene®) (30.0 mL) containing a magnetic stir bar was charged with **1a** (1.0 g, 5.0 mmol), Fluolead (3.77 g, 15.0 mmol, 3.0 equiv.) and nHF·Pyridine complex (HF 70%, pyridine 30%, 25.0 mmol, 5.0 equiv., neat). The tube was tightly sealed then stirred at 70 °C for 24 hours. Then, the mixtures were cooled down to room temperature and menthol (10.0 mL) was added to the mixtures stirring for additional 30 min at room temperature. Then, the mixtures were added to 1 M aqueous NaHCO<sub>3</sub> (10.0 mL) at 0°C, extracted with Et<sub>2</sub>O (3 x 20 mL) and the combined organic layer was dried over anhydrous Na<sub>2</sub>SO<sub>4</sub>, filtered and concentrated under reduced pressure. The yield (>99%) was determined by <sup>19</sup>F NMR analysis of

the crude mixture by using  $\text{C}_6\text{H}_5\text{OCF}_3$  (515.0  $\mu\text{L}$ , 5.0 mmol, 1.0 equiv.) as an internal standard. The crude mixture was purified by column chromatography (*n*-Hexane) to afford the title compound **2a** (963.1 mg, 87% yield) as a white solid.

## 5. Preparation of Starting Materials

Acyl fluoride **1i** is known compounds and obtained from commercial sources. Acyl fluorides **1a** – **1h**, **1m** – **1r** were known compounds and synthesized according to the reported procedures.<sup>11-14</sup>

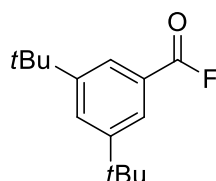

### 3,5-Di-*tert*-butylbenzoyl fluoride (**1j**).

To a solution of the corresponding carboxylic acid (3.0 mmol, 1.0 equiv) in Acetonitrile (10 mL) was added Fluolead (3.0 mmol, 1.0 equiv) at rt. The reaction mixture was stirred at rt for 2 hours, and then quenched with water. The resulting mixture was extracted with DCM (20 mL  $\times$  2). The combined organic layers were washed with brine, dried over anhydrous  $\text{Na}_2\text{SO}_4$ , filtered and concentrated under reduced pressure. The crude mixture was purified by column chromatography (*n*-Hexane) to afford the title compound **1j** (582.1 mg, 82% yield) as a white solid.

**$^1\text{H}$  NMR** (300 MHz,  $\text{CDCl}_3$ )  $\delta$ : 7.88 (s, 2H), 7.76 (s, 1H), 1.35 (s, 18H) ppm.  **$^{13}\text{C}$  NMR** (176 MHz,  $\text{CDCl}_3$ )  $\delta$ : 156.7 (d,  $J$  = 342.2 Hz), 150.5, 128.2, 124.2, 122.9 (d,  $J$  = 62.6 Hz), 33.5, 29.8 ppm.  **$^{19}\text{F}$  NMR** (282 MHz,  $\text{CDCl}_3$ )  $\delta$ : 17.44 (s, 1F) ppm. **HRMS** (EI) calculated for  $\text{C}_{15}\text{H}_{21}\text{FO}$   $[\text{M}]^+$ : 236.1576 found 236.1565. **IR** (KBr): 2960, 1808, 1475, 1217, 1062  $\text{cm}^{-1}$ . **m.p.**: 81.8-82.3°C.

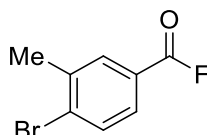

### 4-bromo-3-methylbenzoyl fluoride (**1k**).

To a solution of the corresponding carboxylic acid (3.0 mmol, 1.0 equiv) in Acetonitrile (10 mL) was added Fluolead (3.0 mmol, 1.0 equiv) at rt. The reaction mixture was stirred at rt for 2 hours, and then quenched with water. The resulting mixture was extracted with DCM (20 mL  $\times$  2). The combined organic layers were washed with brine, dried over anhydrous  $\text{Na}_2\text{SO}_4$ , filtered and concentrated under reduced pressure. The crude mixture was purified by column chromatography (*n*-Hexane) to afford the title compound **1k** (293.0 mg, 45% yield) as a white solid.

**$^1\text{H}$  NMR** (700 MHz,  $\text{CDCl}_3$ )  $\delta$ : 7.89 (s, 1H), 7.70 (s, 2H), 2.48 (t,  $J$  = 0.9 Hz, 3H) ppm.  **$^{13}\text{C}$  NMR** (176 MHz,  $\text{CDCl}_3$ )  $\delta$ : 156.9 (d,  $J$  = 343.4 Hz), 139.4, 133.4, 133.3, 133.2 (d,  $J$  = 3.4 Hz), 129.8 (d,  $J$  = 3.4 Hz), 123.9 (d,  $J$  = 61.5 Hz), 22.9 ppm.  **$^{19}\text{F}$  NMR** (282 MHz,  $\text{CDCl}_3$ )  $\delta$ : 17.95 (s, 1F) ppm. **HRMS** (EI) calculated for

$\text{C}_8\text{H}_6\text{BrFO} [\text{M}]^+$ : 215.9586 found 215.9592. **IR** (KBr): 1812, 1596, 1469, 1401, 1186, 898, 876, 838, 747  $\text{cm}^{-1}$ .  
**m.p.**: 49.5-50.2°C.

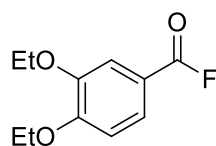

**3,4-diethoxybenzoyl fluoride (11).**

To a solution of the corresponding carboxylic acid (3.0 mmol, 1.0 equiv) in Acetonitrile (10 mL) was added Fluolead (3.0 mmol, 1.0 equiv) at rt. The reaction mixture was stirred at rt for 2 hours, and then quenched with water. The resulting mixture was extracted with DCM (20 mL  $\times$  2). The combined organic layers were washed with brine, dried over anhydrous  $\text{Na}_2\text{SO}_4$ , filtered and concentrated under reduced pressure. The crude mixture was purified by column chromatography (*n*-Hexane/ $\text{Et}_2\text{O}$  = 5/1) to afford the title compound **11** (496.2 mg, 78% yield) as a white solid.

**$^1\text{H}$  NMR** (300 MHz,  $\text{CDCl}_3$ )  $\delta$ : 7.76 – 7.60 (m, 1H), 7.48 (s, 1H), 6.95 – 6.19 (m,  $J$  = 8.6, 4.0 Hz, 1H), 4.22 – 4.13 (m, 4H), 1.55 – 1.46 (m, 6H) ppm.  **$^{13}\text{C}$  NMR** (176 MHz,  $\text{CDCl}_3$ )  $\delta$ : 157.4 (d,  $J$  = 339.4 Hz), 154.8, 148.6, 126.1 (d,  $J$  = 2.9 Hz), 116.5 (d,  $J$  = 61.6 Hz), 114.8 (d,  $J$  = 5.5 Hz), 111.7, 64.70, 64.66, 14.6, 14.5 ppm.  **$^{19}\text{F}$  NMR** (282 MHz,  $\text{CDCl}_3$ )  $\delta$ : 14.99 (s, 1F) ppm. **HRMS** (EI) calculated for  $\text{C}_{11}\text{H}_{13}\text{FO}_3 [\text{M}]^+$ : 212.0849 found 212.0859. **IR** (KBr): 1781, 1597, 1521, 1397, 1279, 1198, 1144, 1037, 943  $\text{cm}^{-1}$ . **m.p.**: 55.3-56.0 °C.

## 6. References

1. Zhao, S.; Guo, Y.; Han, E.J.; Luo, J.; Liu, H.M.; Liu, C.; Xie, W.; Zhang, W.; Wang, M. *Org. Chem. Front.*, **2018**, *5*, 1143–1147.
2. Mizuta, S.; Stenhagen, I.S.; O'Duill, M.; Wolstenhulme, J.; Kirjavainen, A.K.; Forsback, S.J.; Tredwell, M.; Sandford, G.; Moore, P.R.; Huiban, M.; Luthra, S.K. *Org. Lett.*, **2013**, *15*, 2648–2651.
3. Kondo, H.; Oishi, M.; Fujikawa, K.; Amii, H. *Adv. Synth. Catal.*, **2011**, *353*, 1247–1252.
4. Zhang, X.; Yang, C. *Adv. Synth. Catal.*, **2015**, *357*, 2721–2727.
5. Kameo, H.; Yamamoto, J.; Asada, A.; Nakazawa, H.; Matsuzaka, H.; Bourissou, D. *Angew. Chem.*, **2019**, *131*, 18959–18963.
6. Trofymchuk, S.; Bugera, M.Y.; Klipkov, A.A.; Razhyk, B.; Semenov, S.; Tarasenko, K.; Starova, V.S.; Zaporozhets, O.A.; Tananaiko, O.Y.; Alekseenko, A.N.; Pustovit, Y. *J. Org. Chem.* **2020**, *85*, 3110–3124.
7. Yang, Y.-D.; Iwamoto, K.; Tokunaga, E.; Shibata, N. *Chem. Commun.*, **2013**, *49*, 5510–5512.
8. Cloux, R.; Kovats, E. *Synthesis*, **1992**, *4*, 409–412.
9. Duddeck, H.; Spitzer, M.; Bolte, G. *Liebigs Ann. Chem.*, **1985**, *3*, 545–554.
10. Hafner, A.; Bräse, S. *Adv. Synth. Catal.*, **2011**, *353*, 3044–3048.
11. Liang, Y.; Zhao, Z.; Shibata, N. *Commun. Chem.*, **2020**, *3*, 59.
12. Scattolin, T.; Deckers, K.; Schoenebeck, F. *Org. Lett.*, **2017**, *19*, 5740–5743.
13. Munoz, S.B.; Dang, H.; Ispizua-Rodriguez, X.; Mathew, T.; Prakash, G.S. *Org. Lett.*, **2019**, *21*, 1659–1663.
14. Han, J.; Zhou, W.; Zhang, P.C.; Wang, H.; Zhang, R.; Wu, H.H.; Zhang, J. *ACS Catal.* **2019**, *9*, 6890–6895.

## 7. $^1\text{H}$ NMR Spectra, $^{19}\text{F}$ NMR Spectra and $^{13}\text{C}$ NMR Spectra

### 4-(Trifluoromethyl)-1,1'-biphenyl (2a)

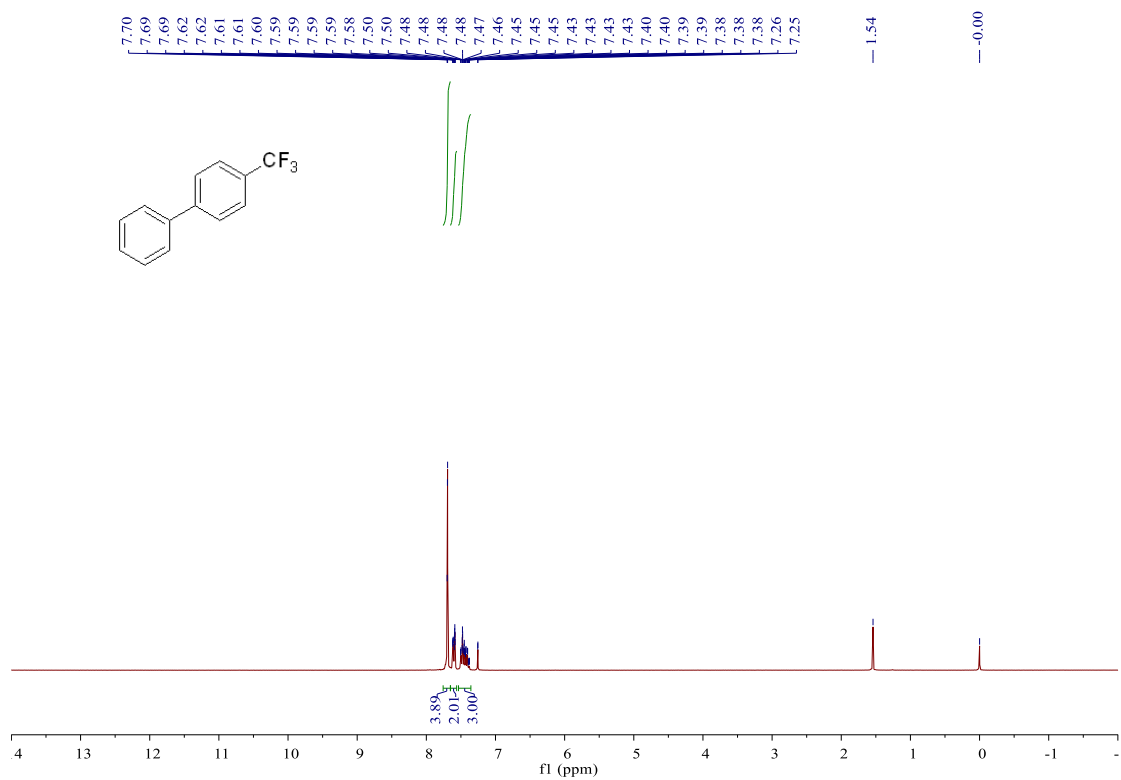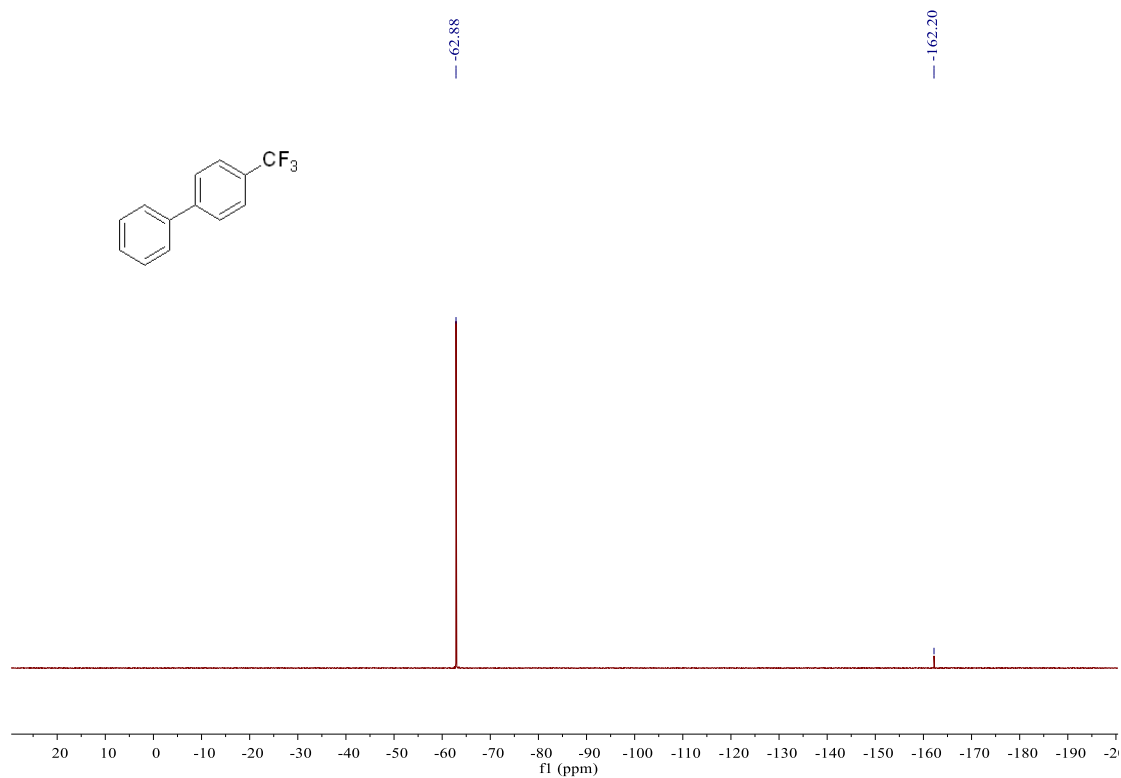

**2-(Trifluoromethyl)-1,1'-biphenyl (2b).**

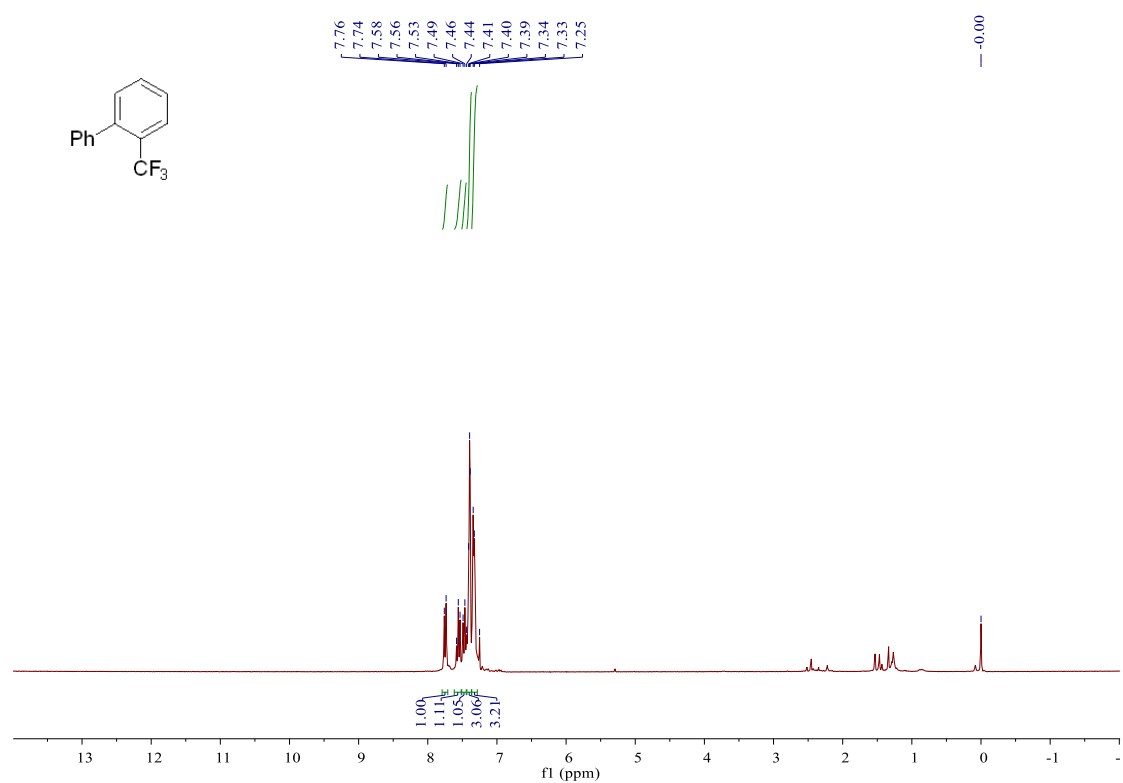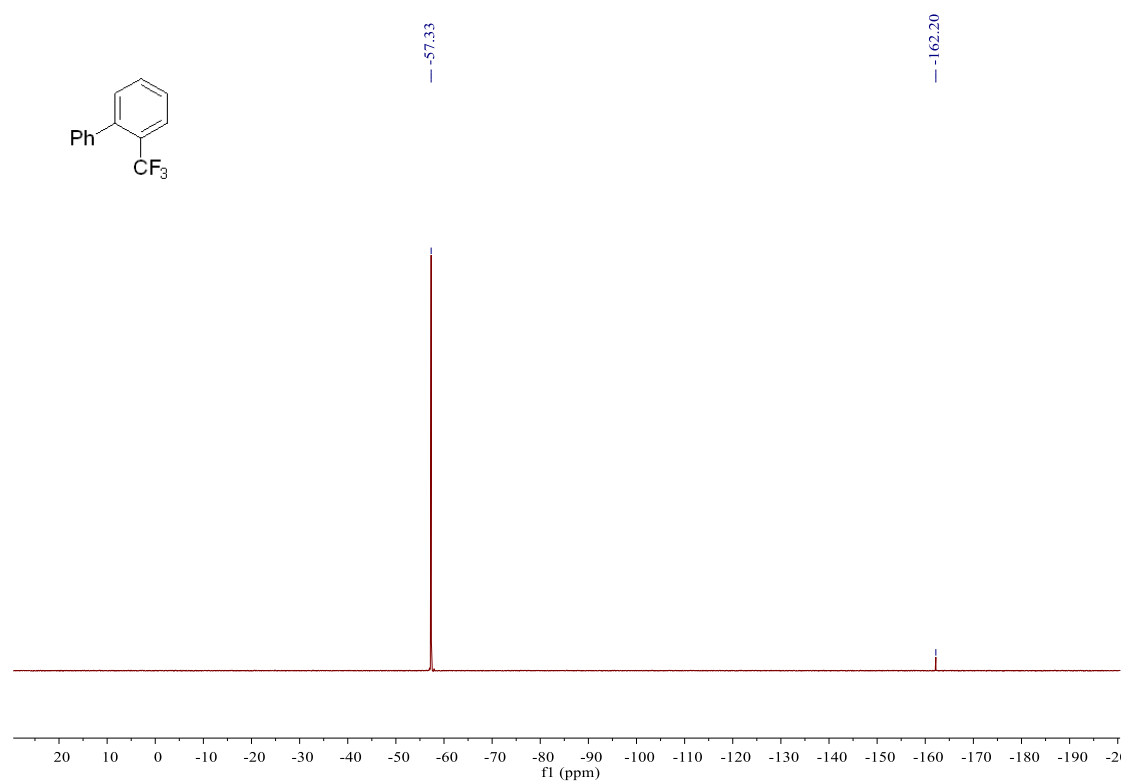

**1-Bromo-4-(trifluoromethyl)benzene (2c).**

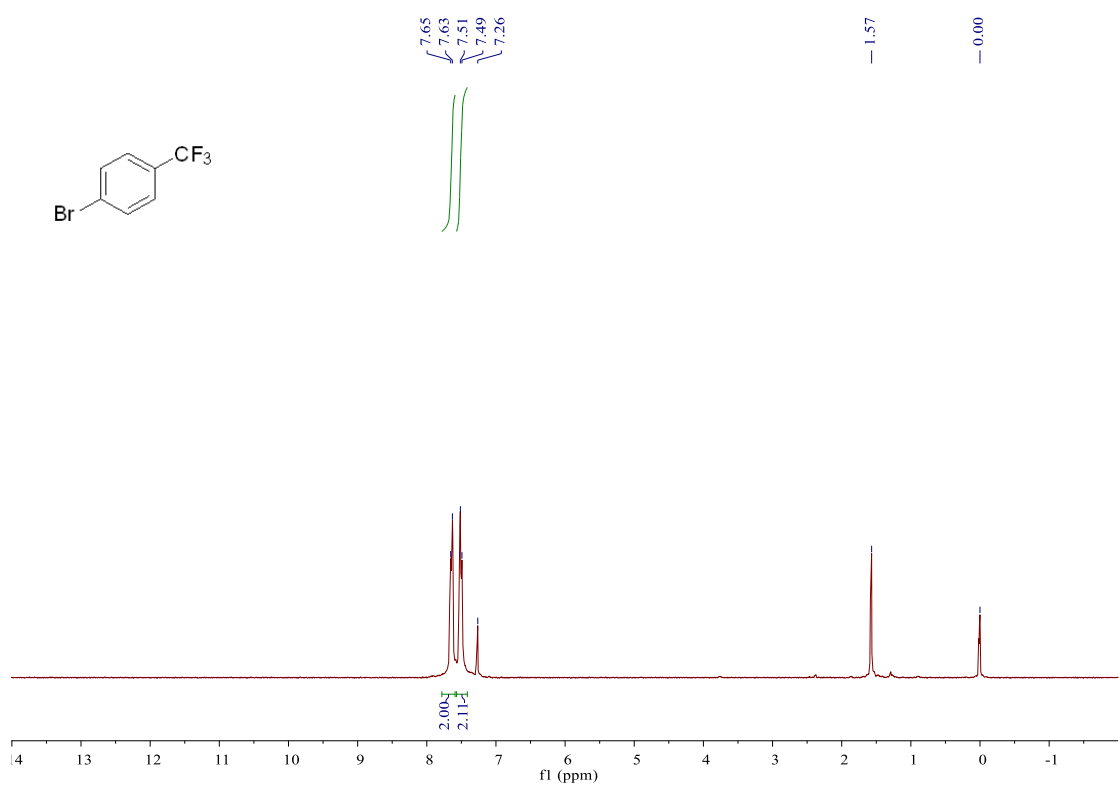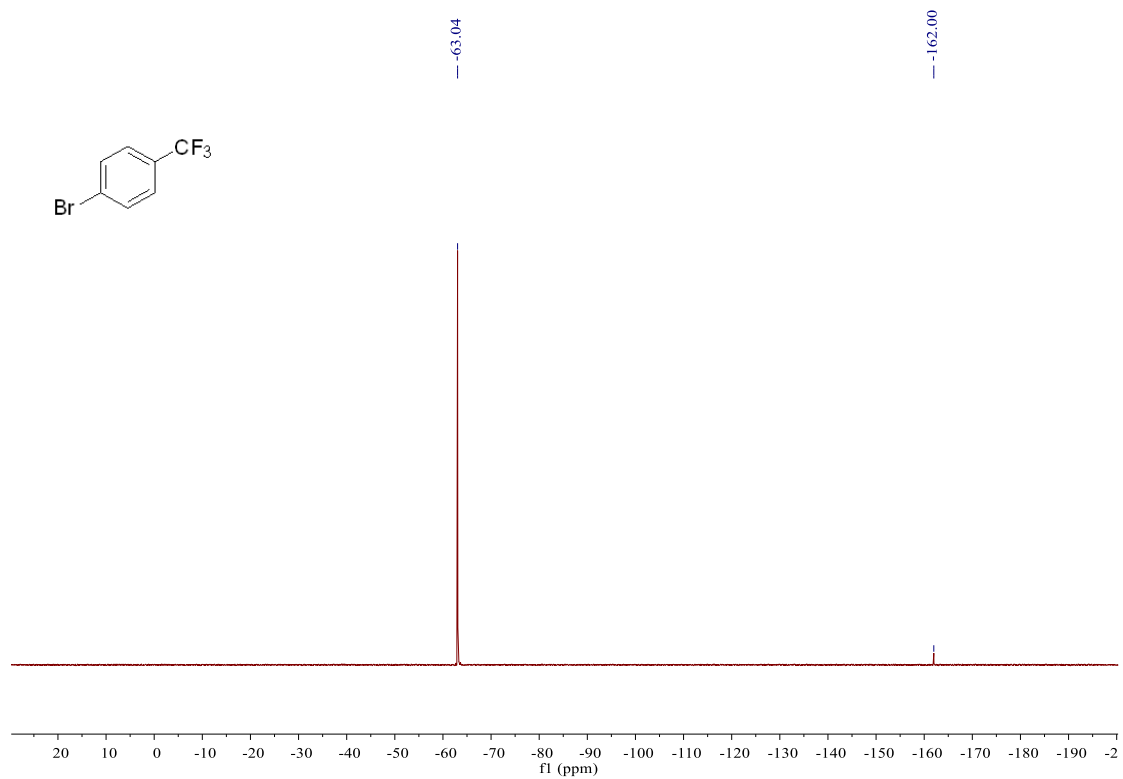



**1-Butyl-4-(trifluoromethyl)benzene (2d).**

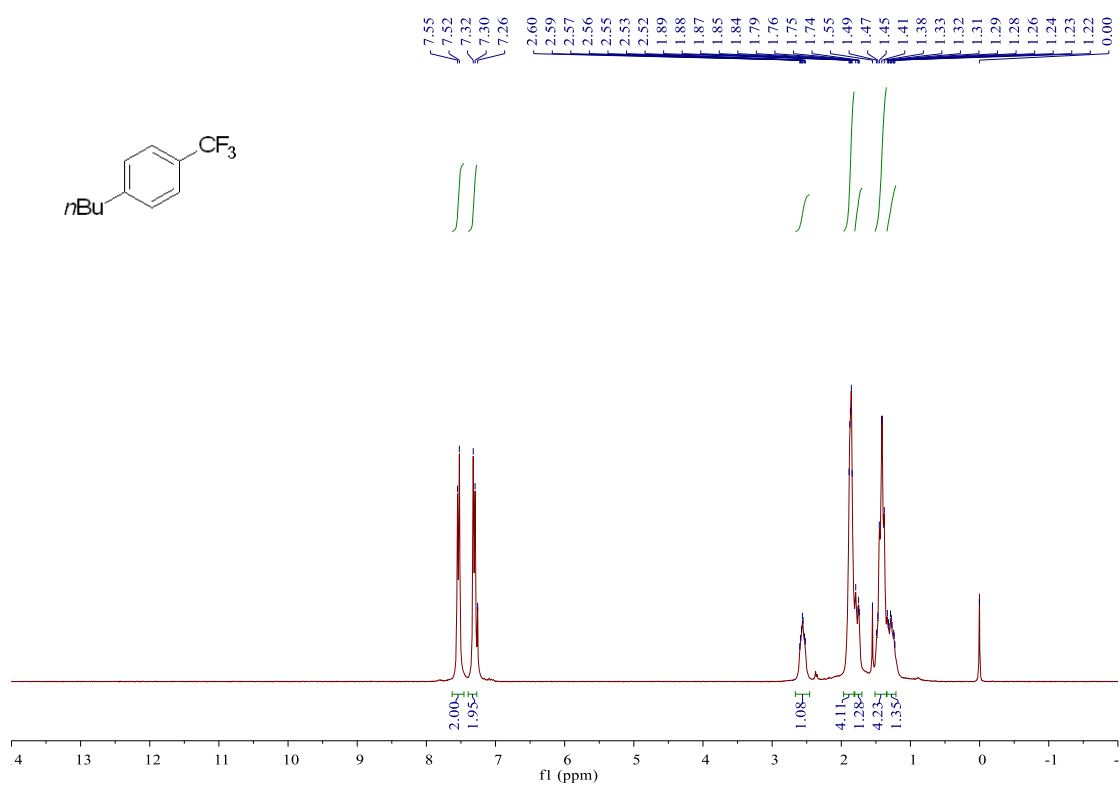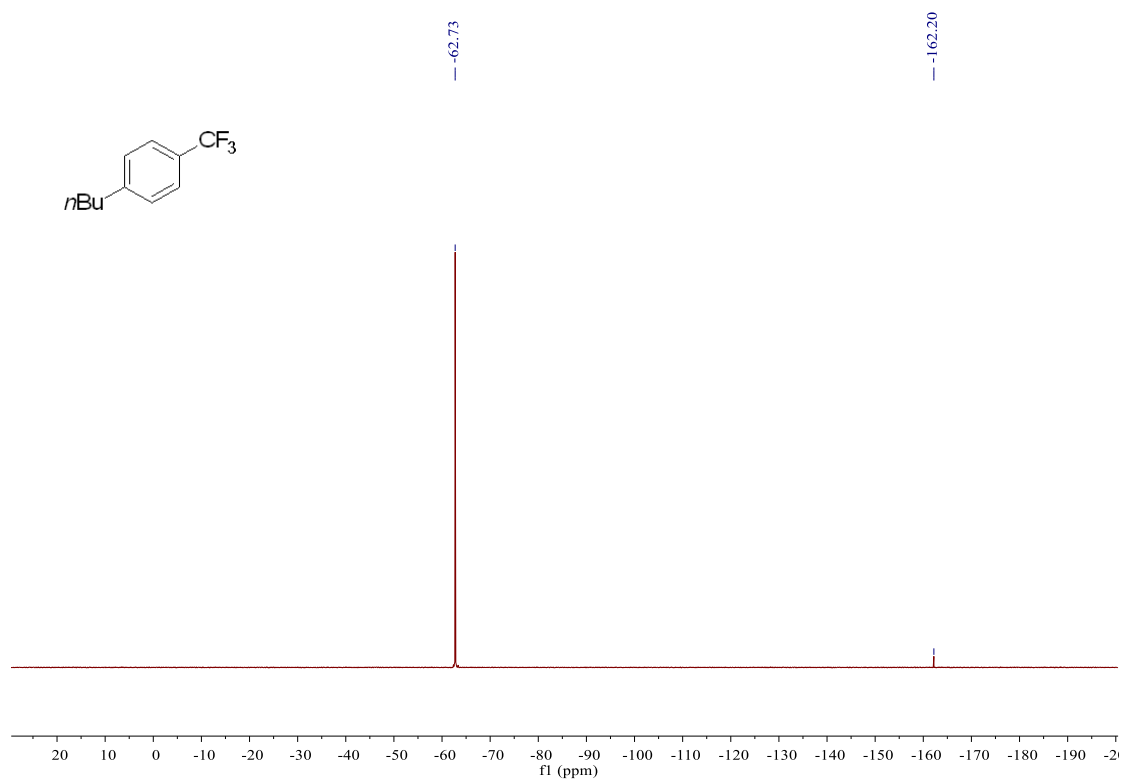

1-Cyclohexyl-4-(trifluoromethyl)benzene (2e).

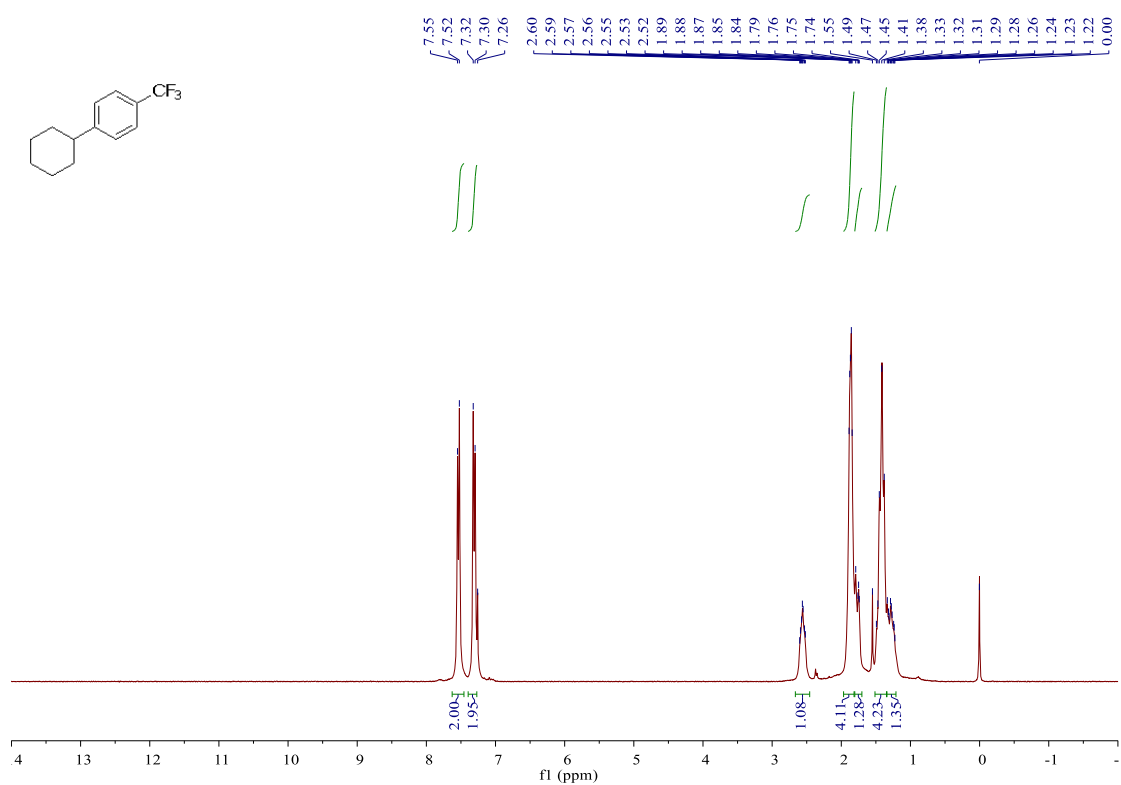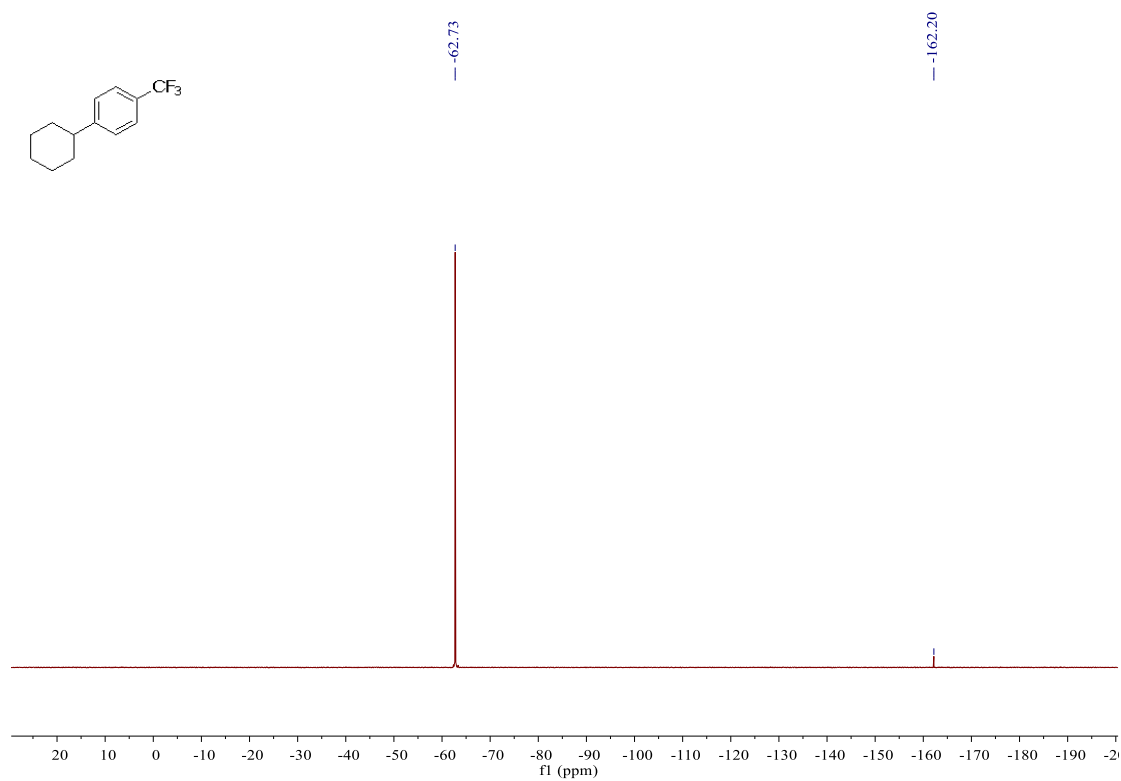

**1-Methyl-4-(trifluoromethyl)benzene (2f).**

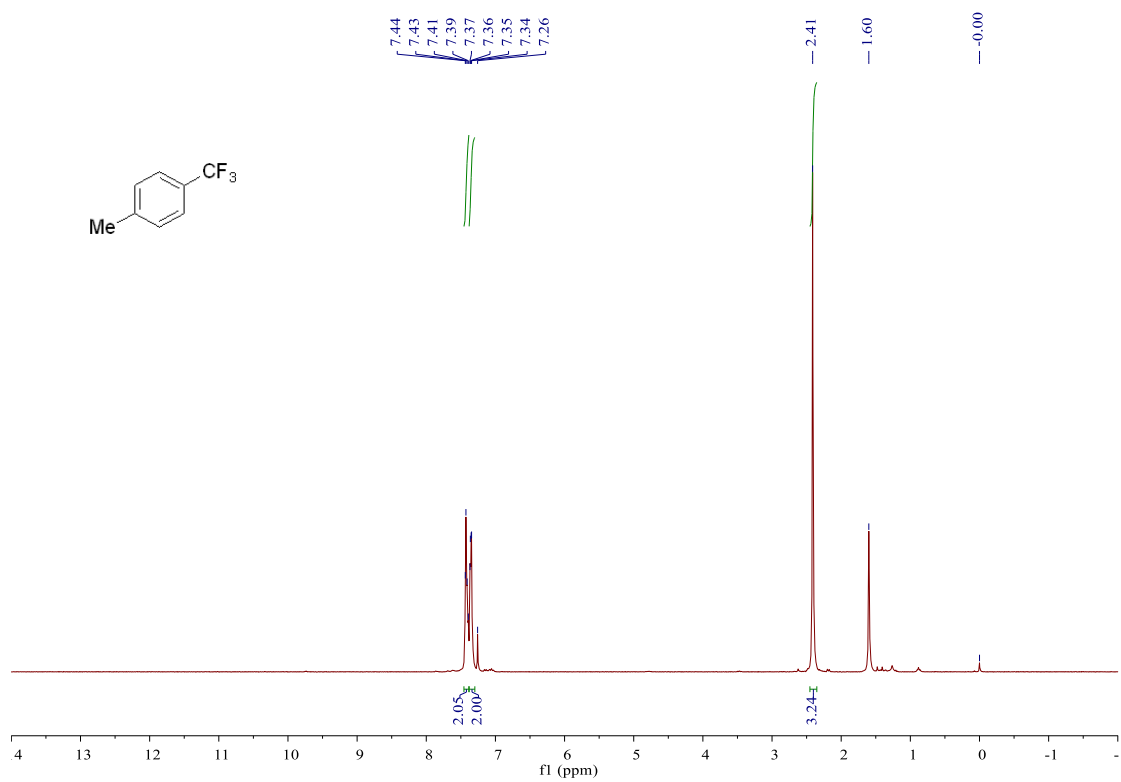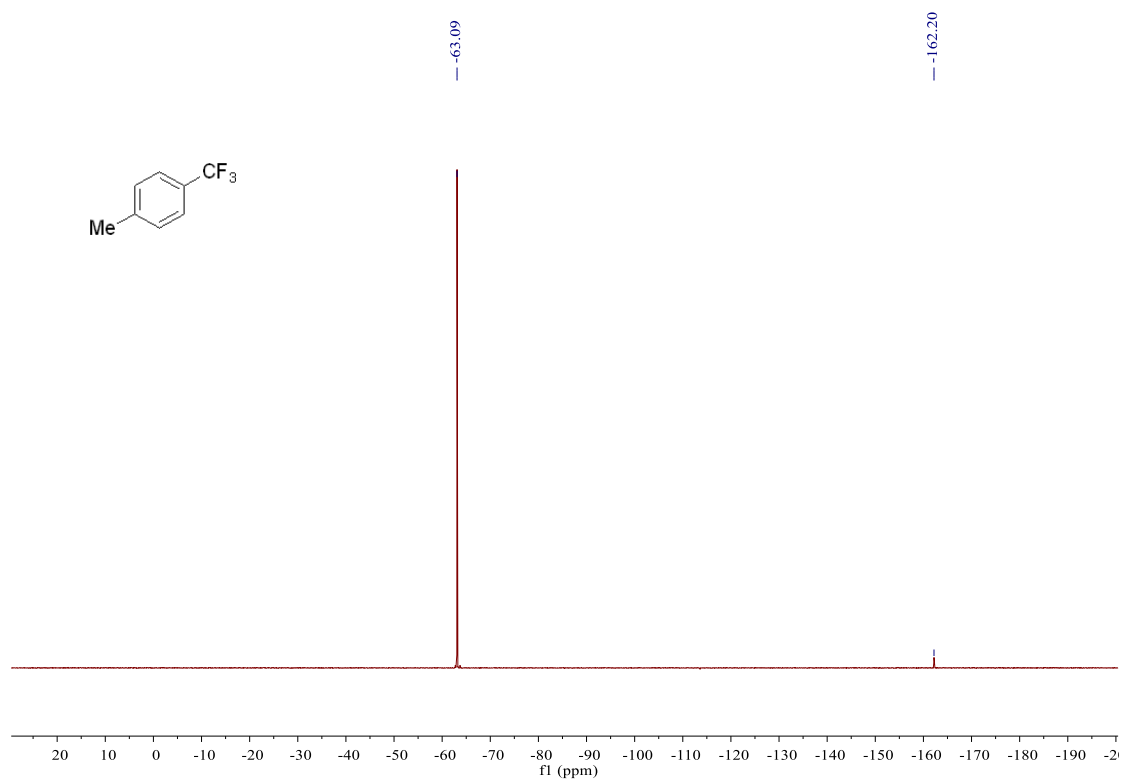

**2-(Trifluoromethyl)naphthalene (2g).**

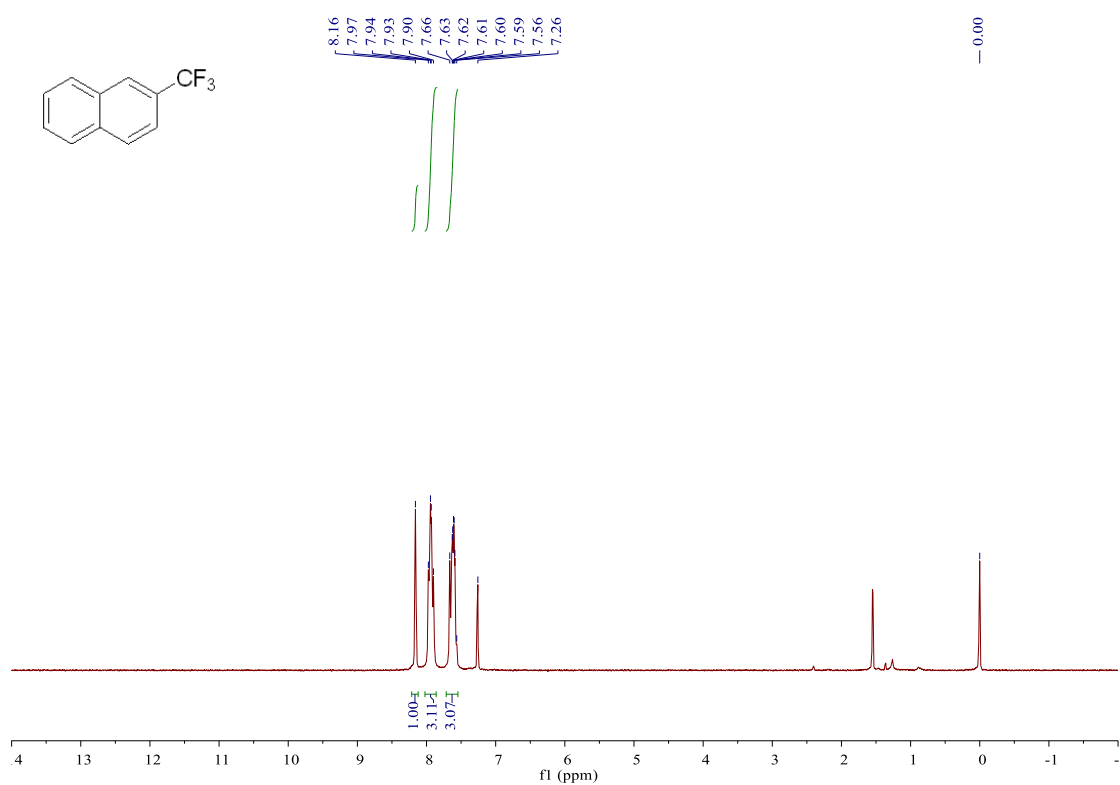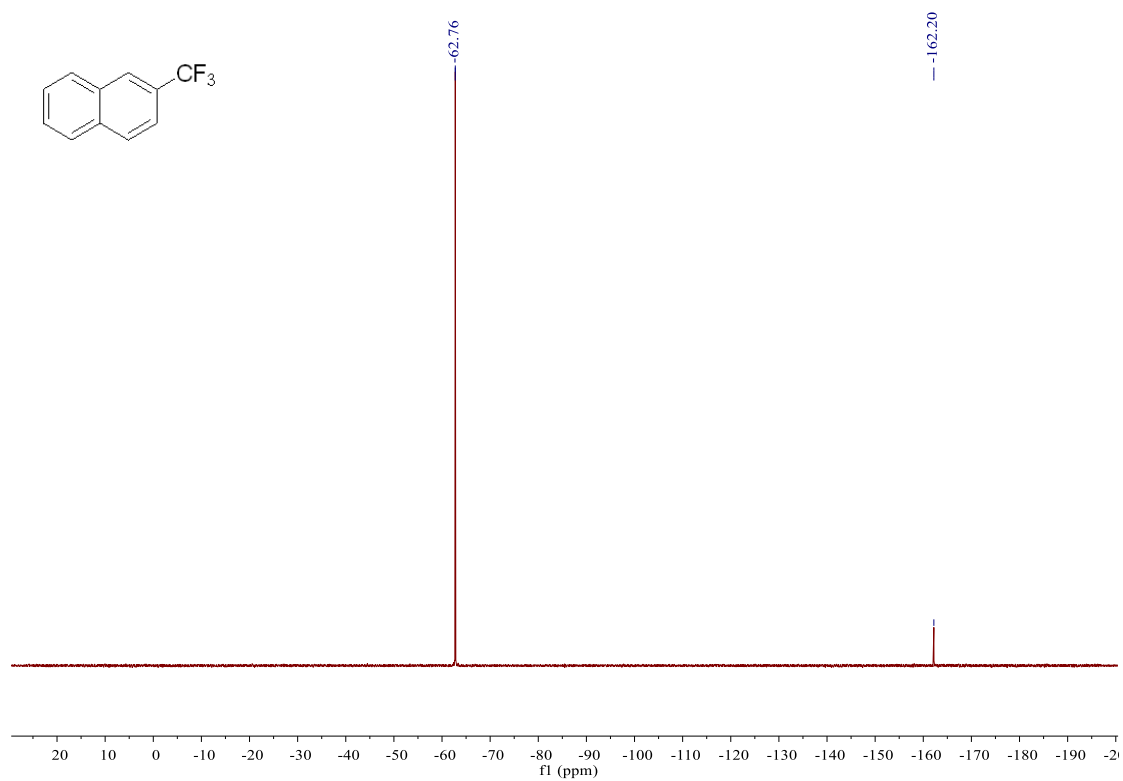

**1-(Trifluoromethyl)naphthalene (2h).**

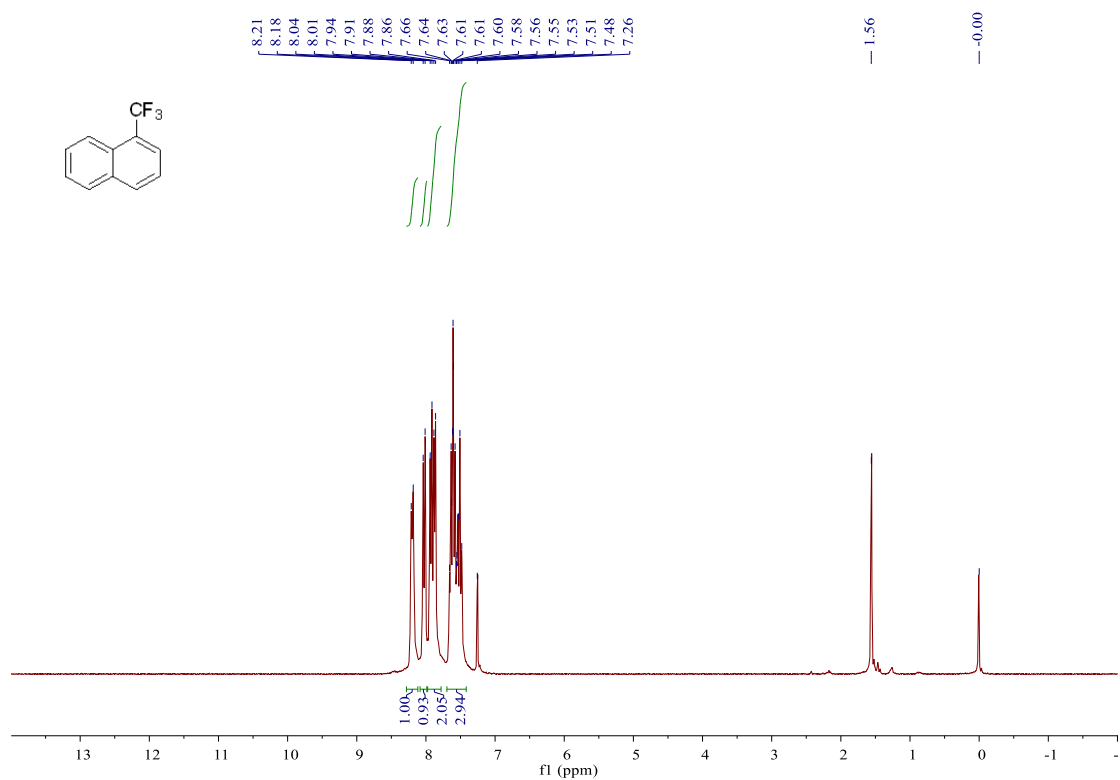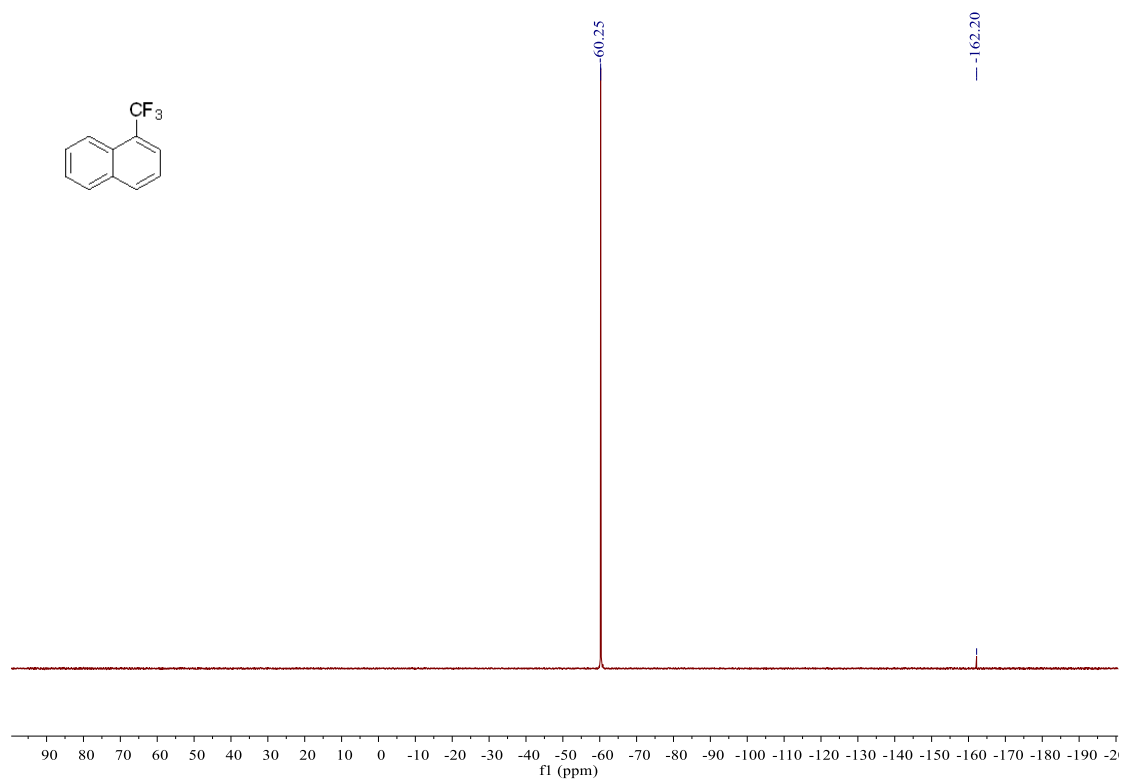

(Trifluoromethyl)benzene (2i).

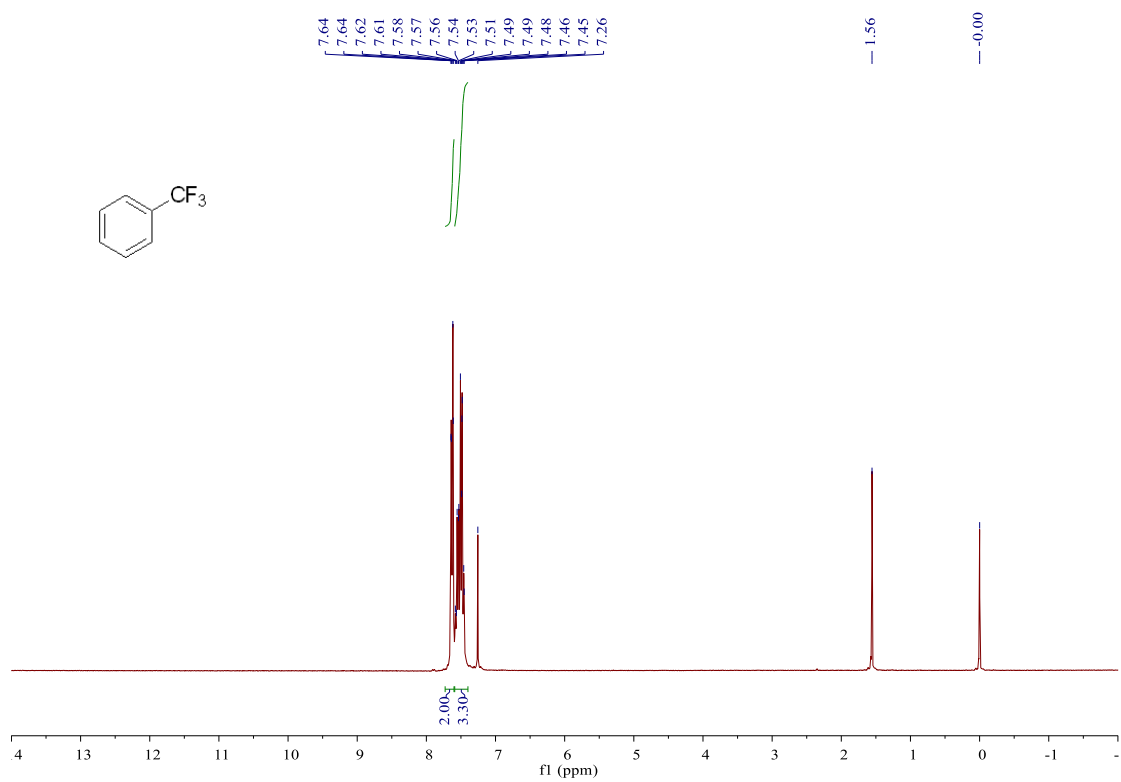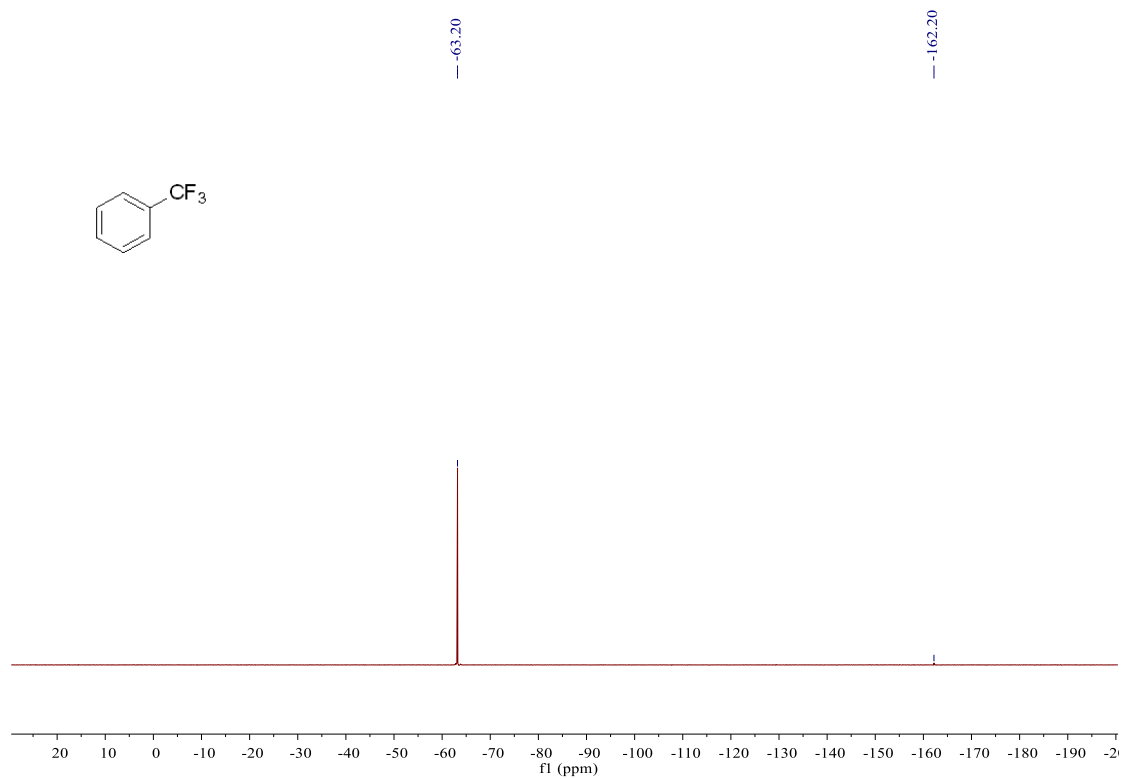

1,3-Di-*tert*-butyl-5-(trifluoromethyl)benzene (2j).

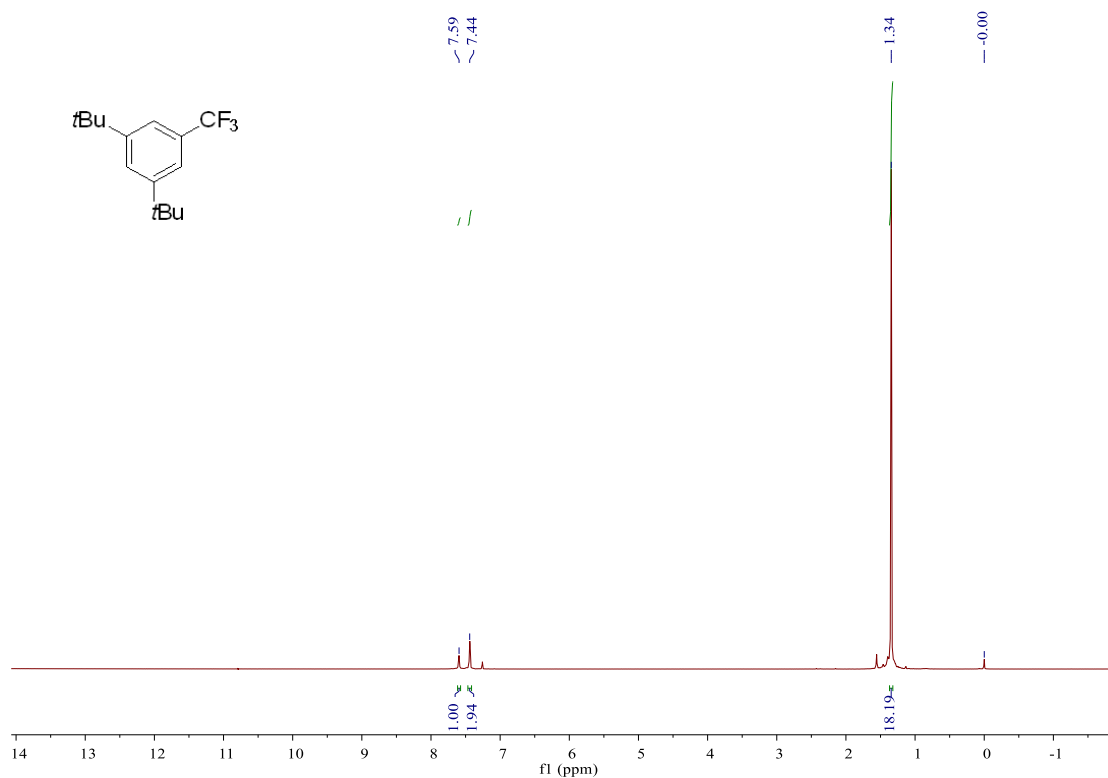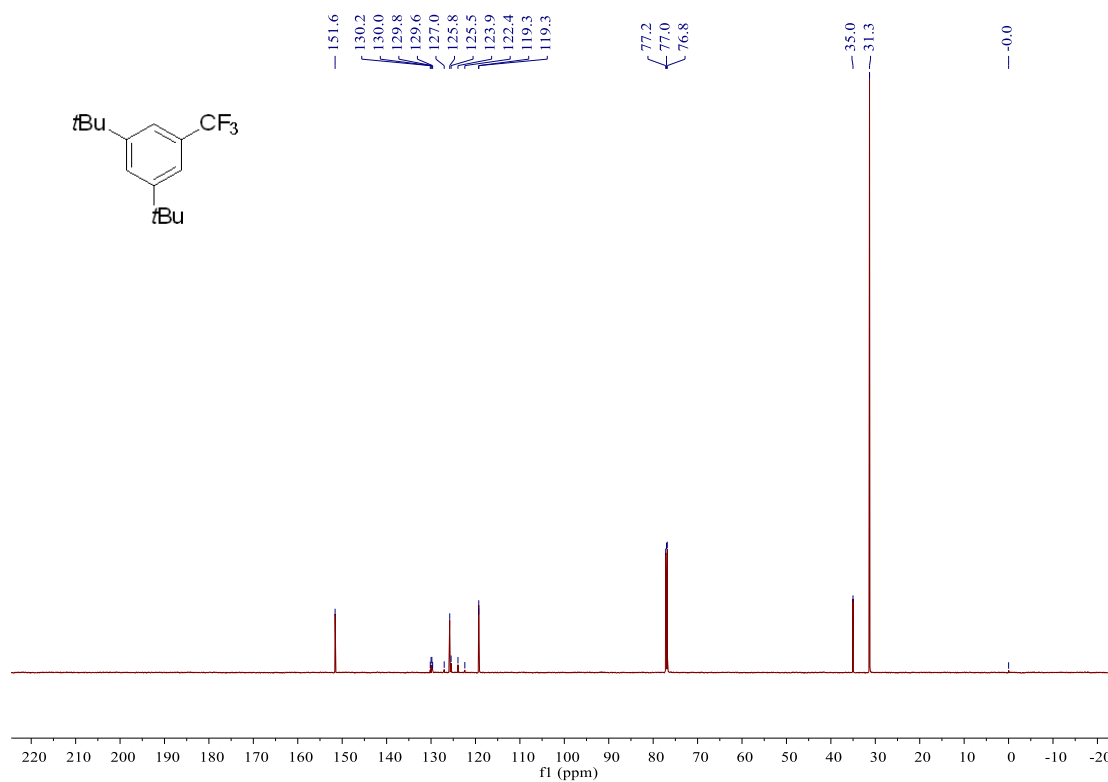

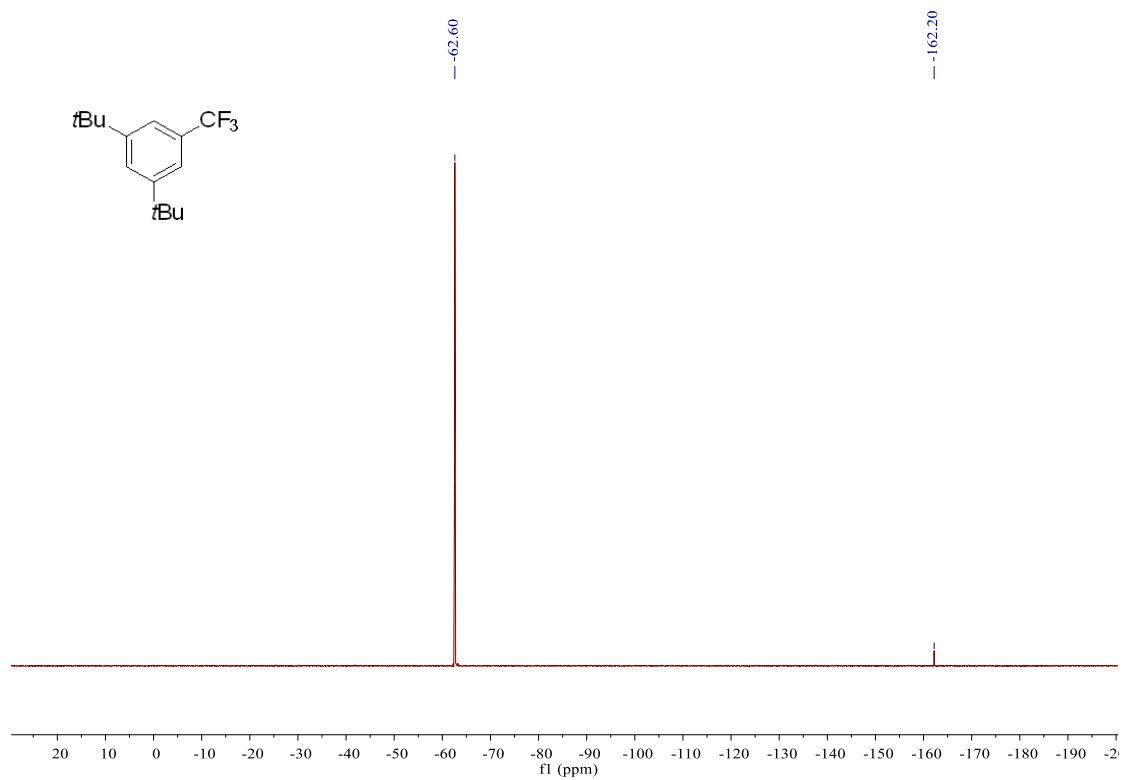

**1-Bromo-2-methyl-4-(trifluoromethyl)benzene (2k).**

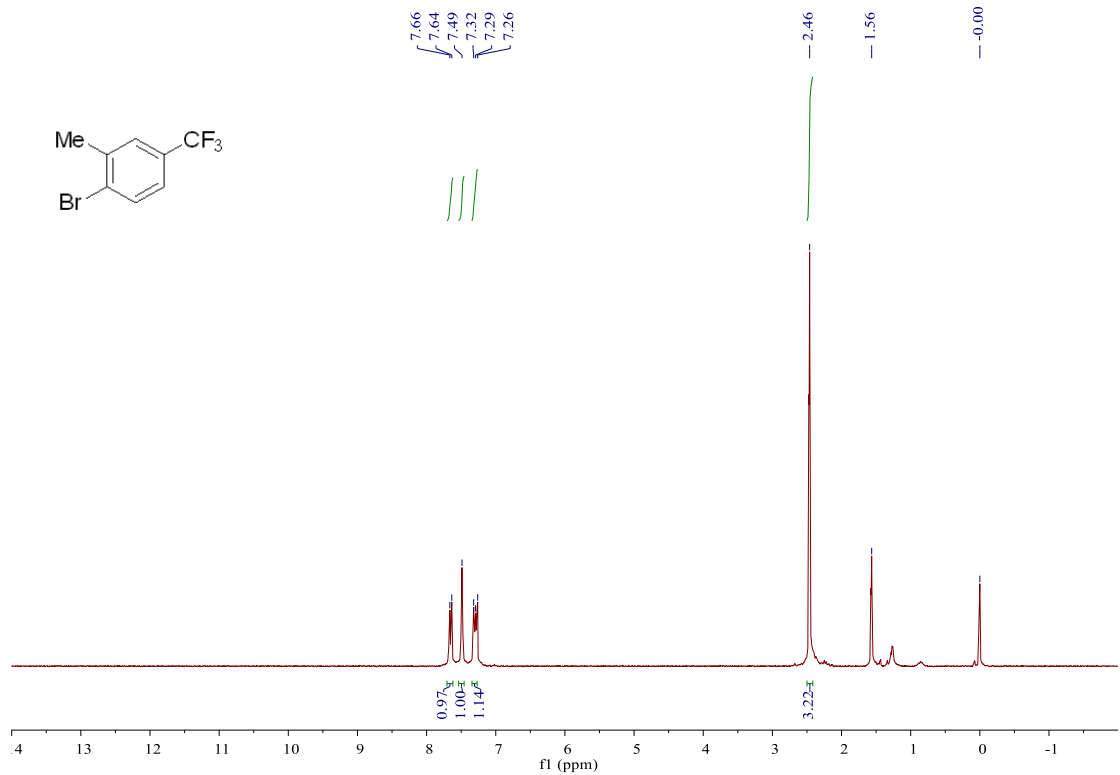



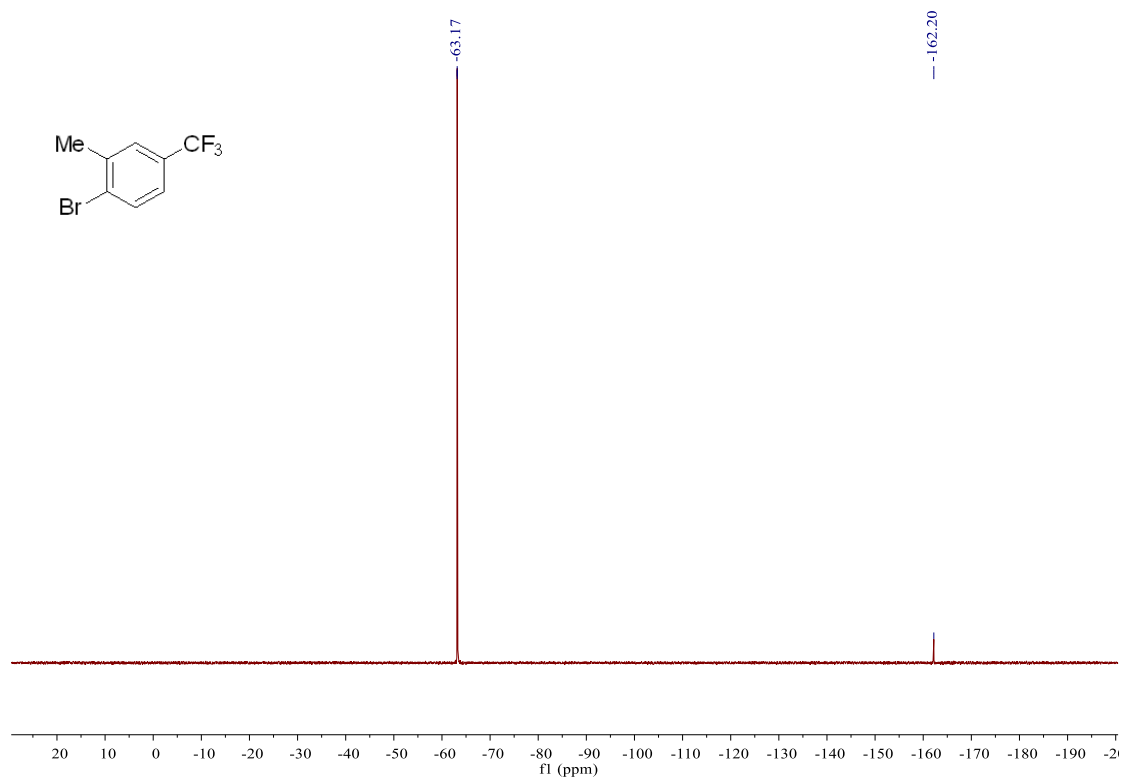

**1,2-Diethoxy-4-(trifluoromethyl)benzene (21).**

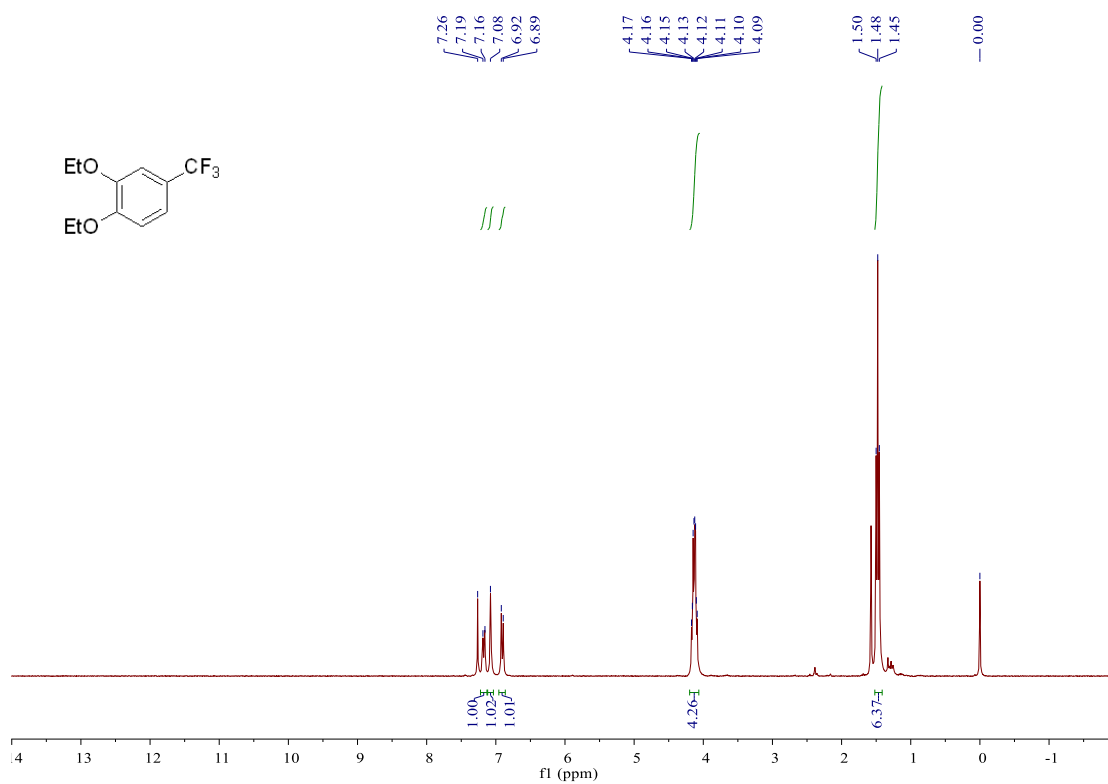

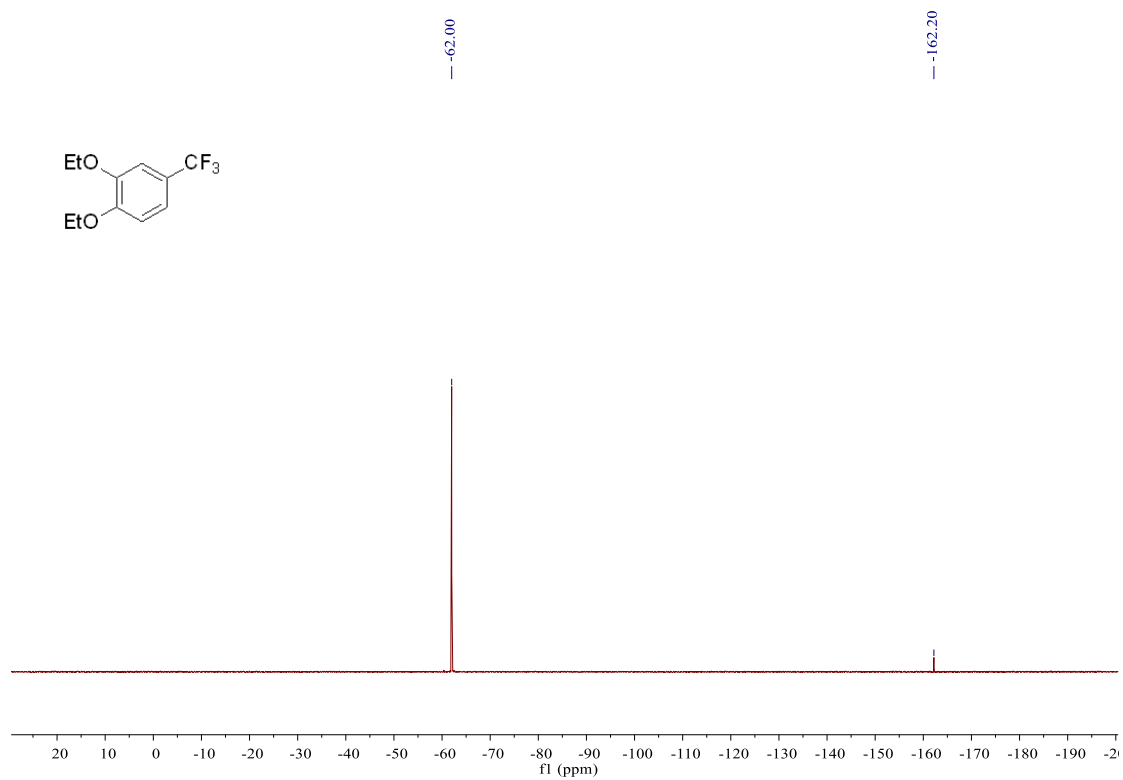

**2-(Trifluoromethyl)thiophene (2m).**

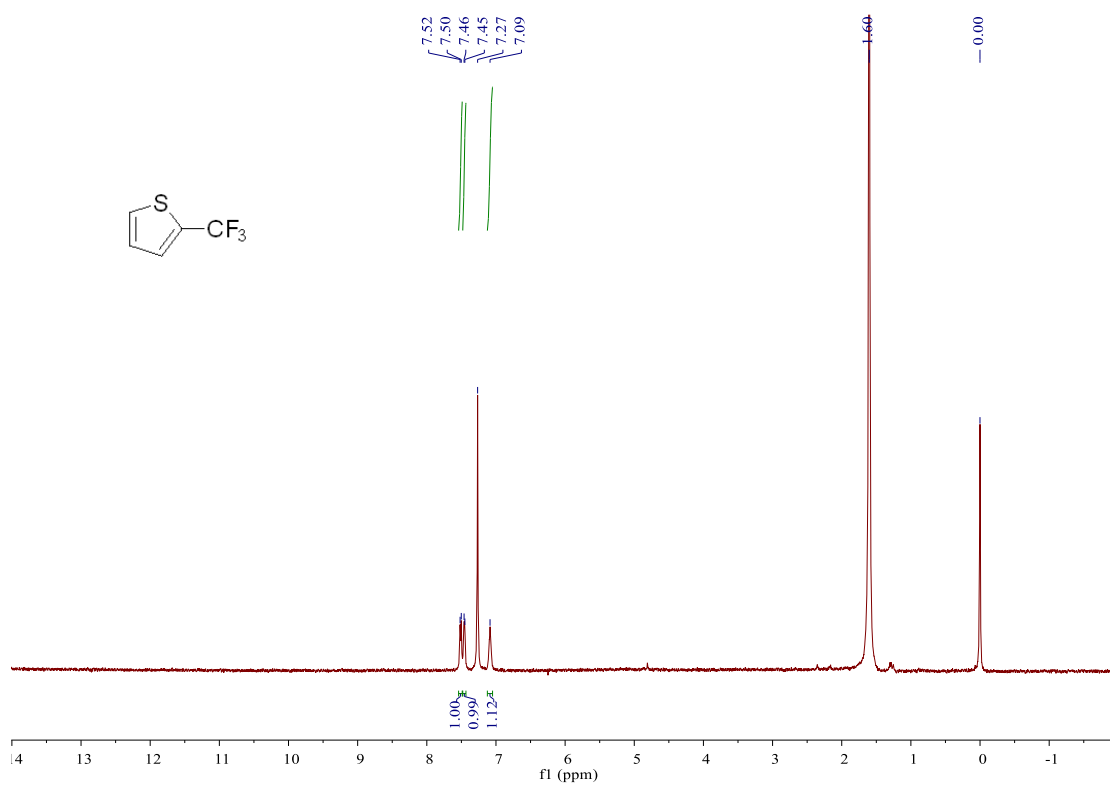

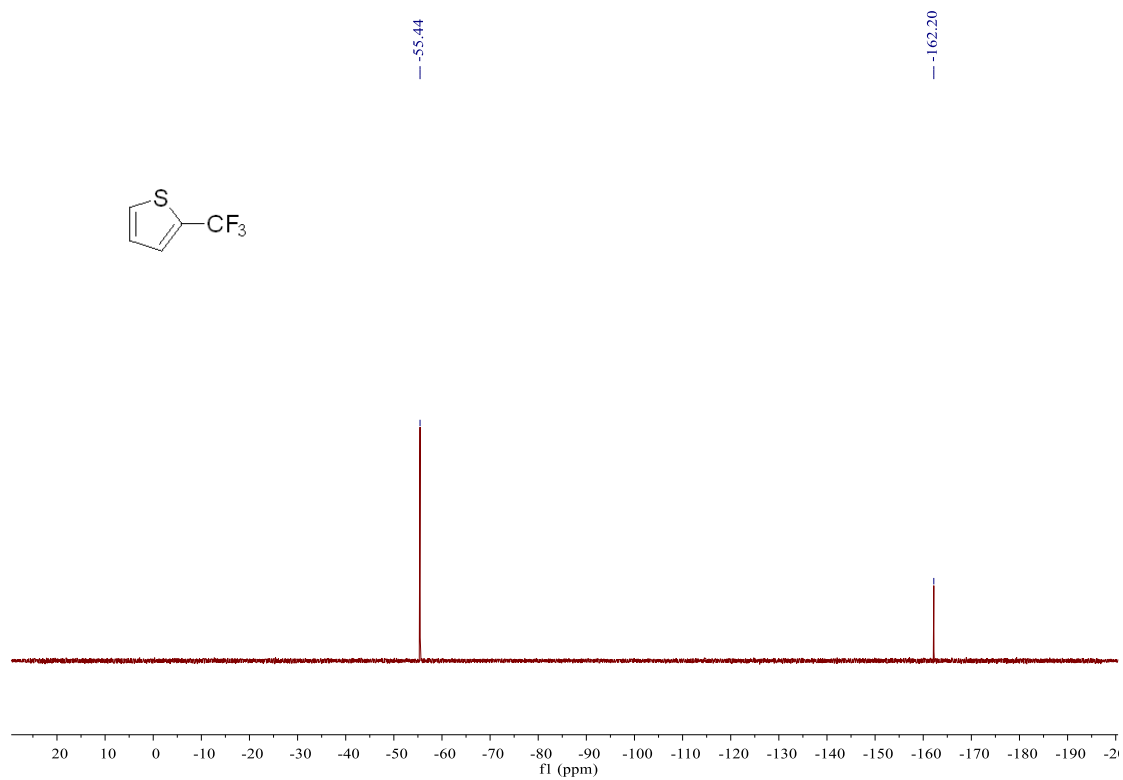

**1,1,1-Trifluorododecane (2n).**

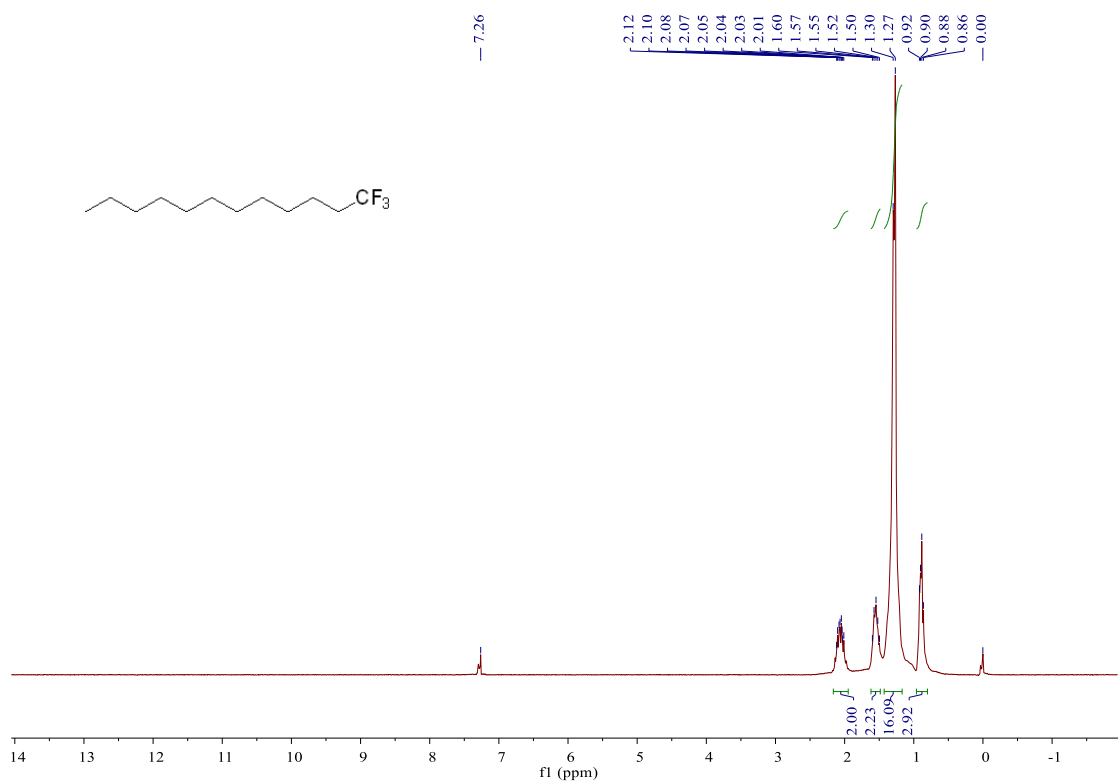

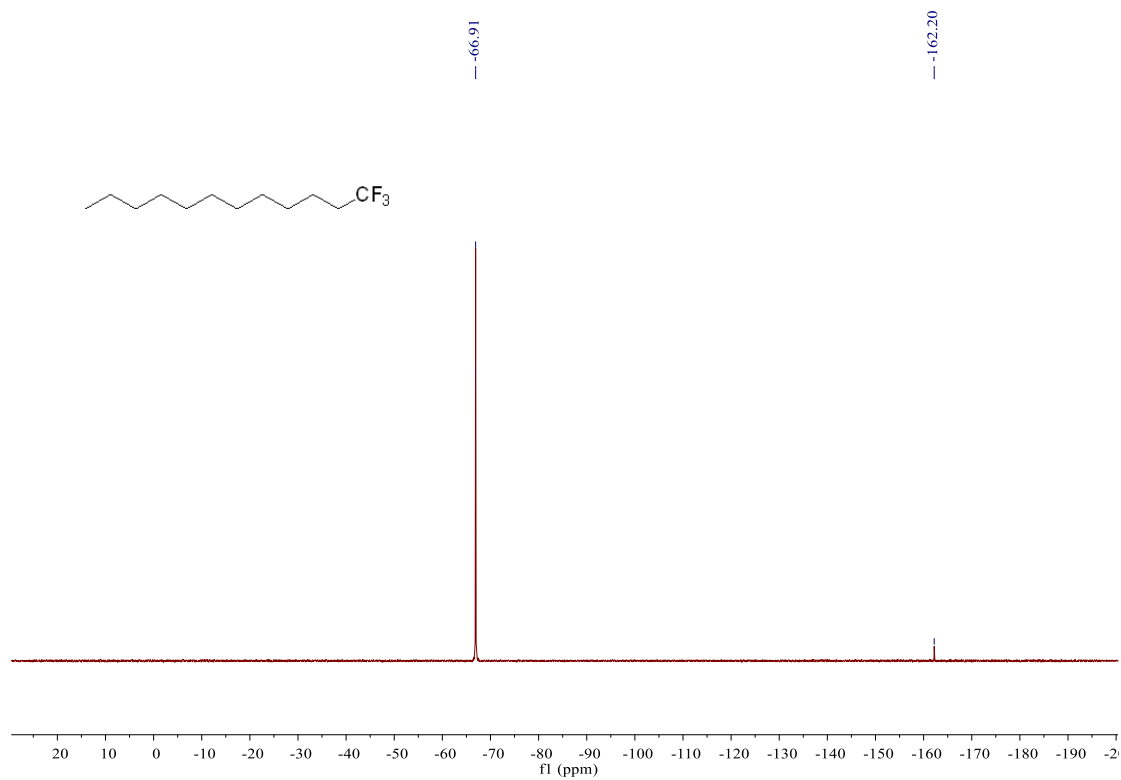

**1-Trifluoromethyladamantane (2o).**

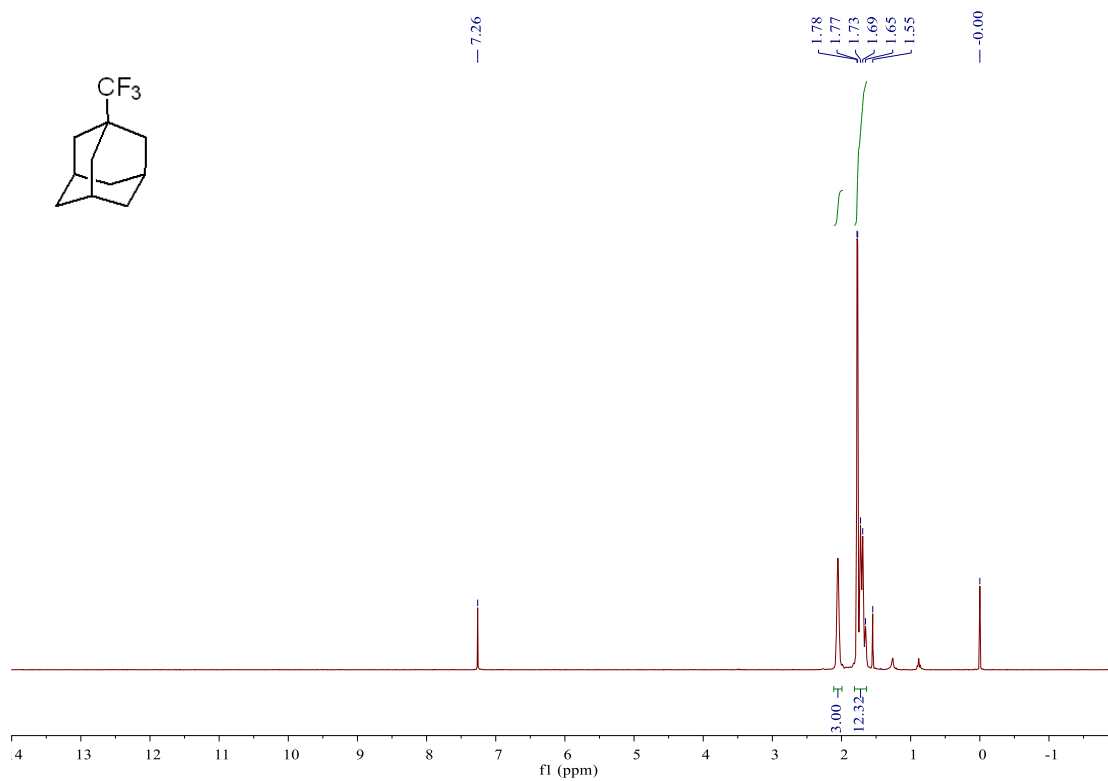

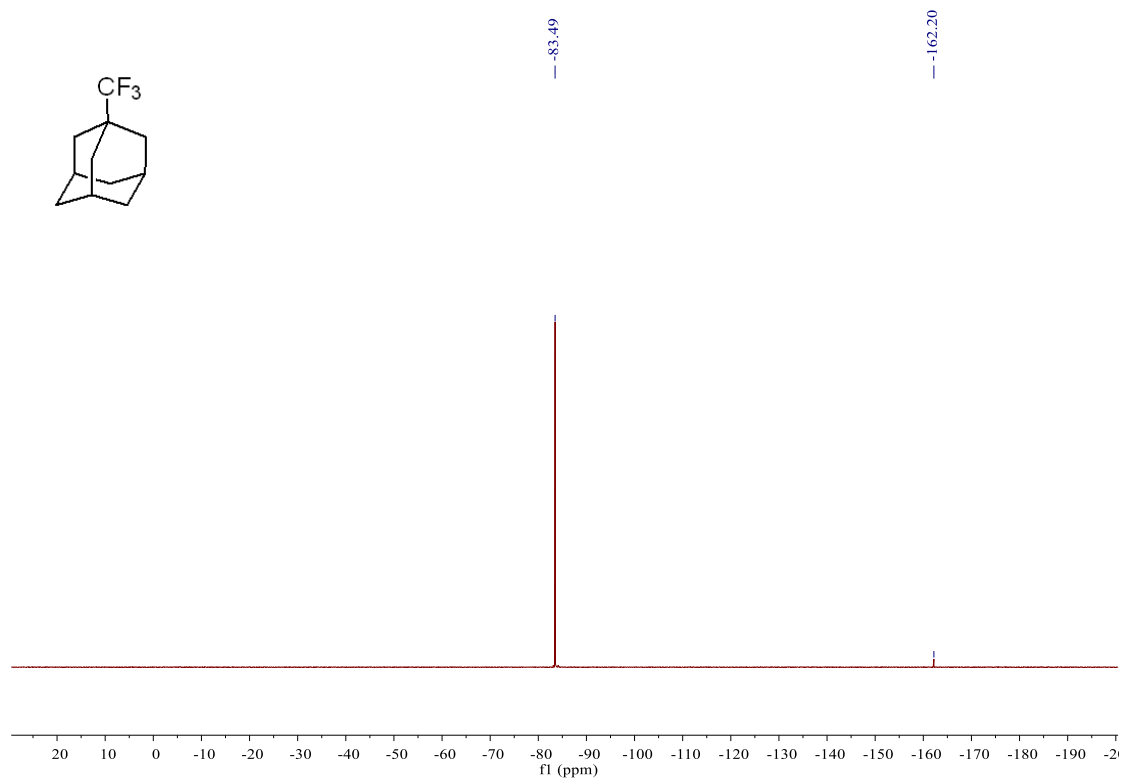

**(E)-1-Phenyl-3,3,3-trifluoroprop-1-ene (2p).**

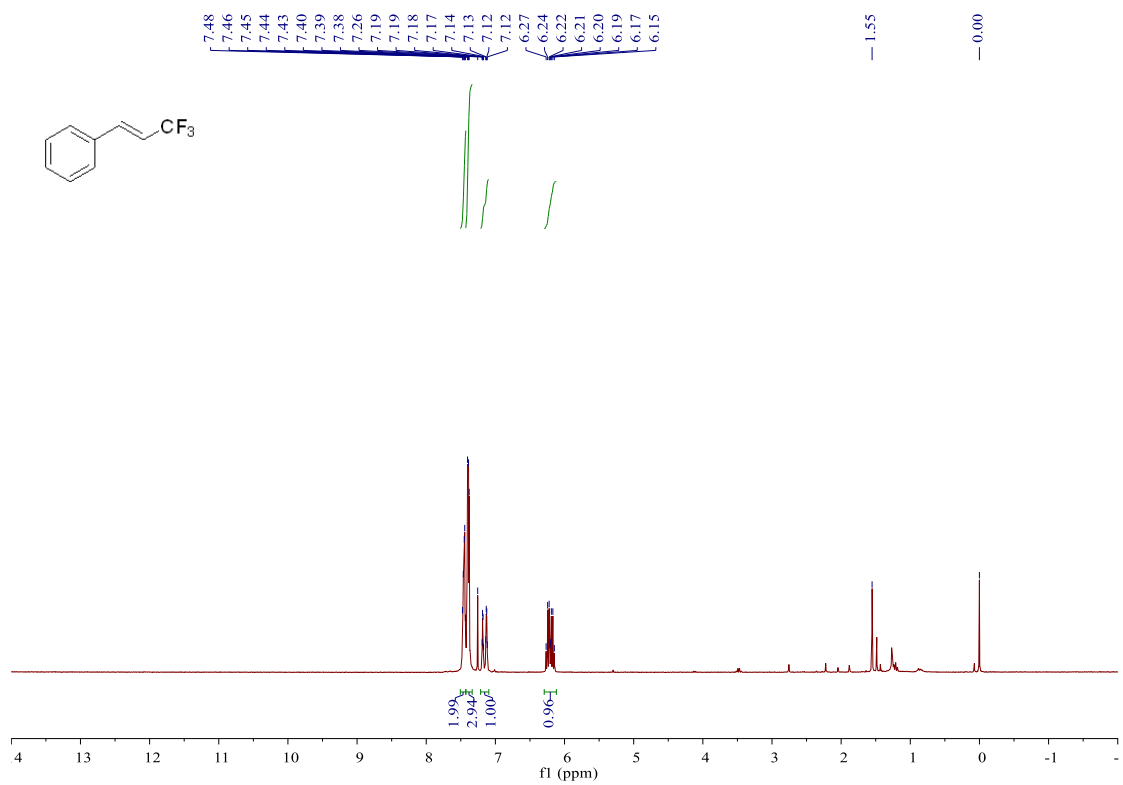

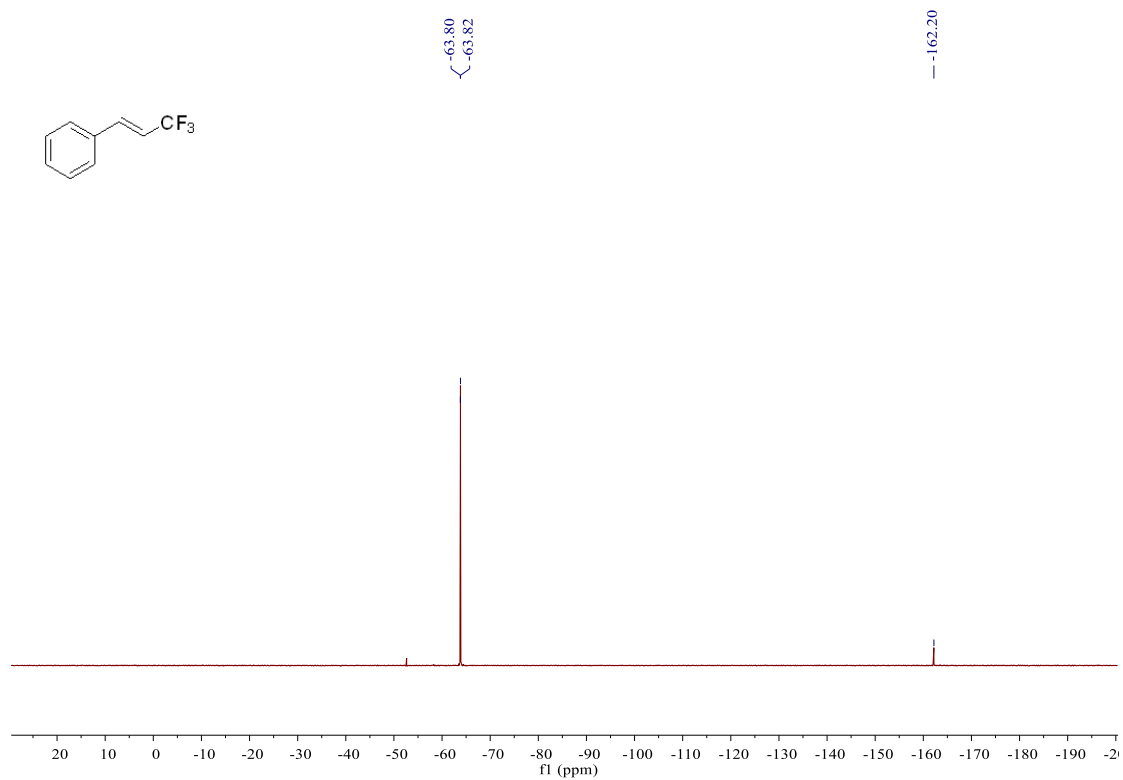

***N,N*-Dipropyl-4-(trifluoromethyl)benzenesulfonamide (2q).**

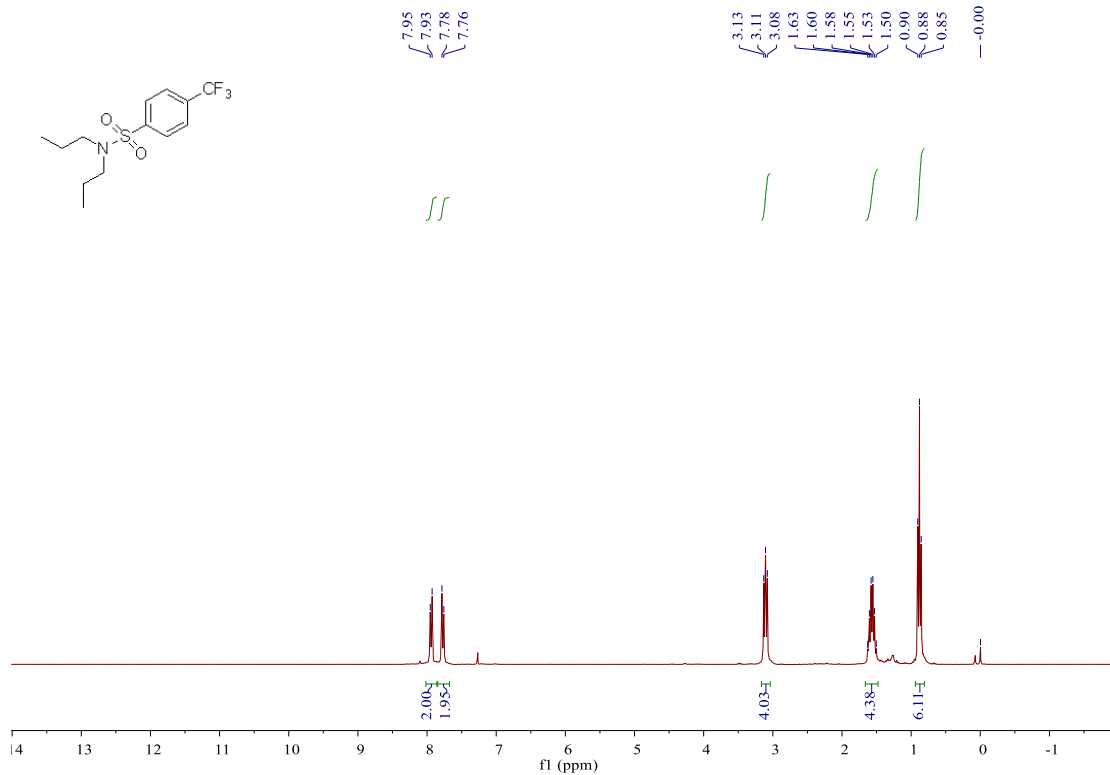

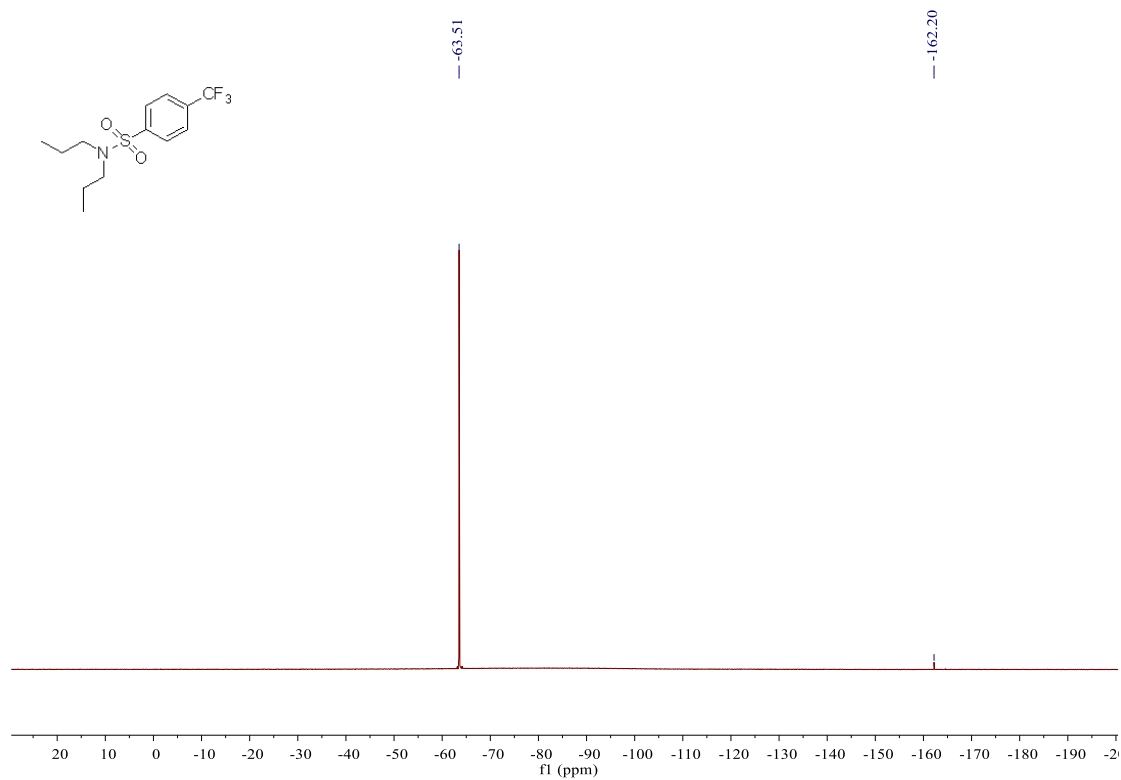

**2-Isobutoxy-5-(4-methyl-5-(trifluoromethyl)thiazol-2-yl)benzonitrile (2r).**

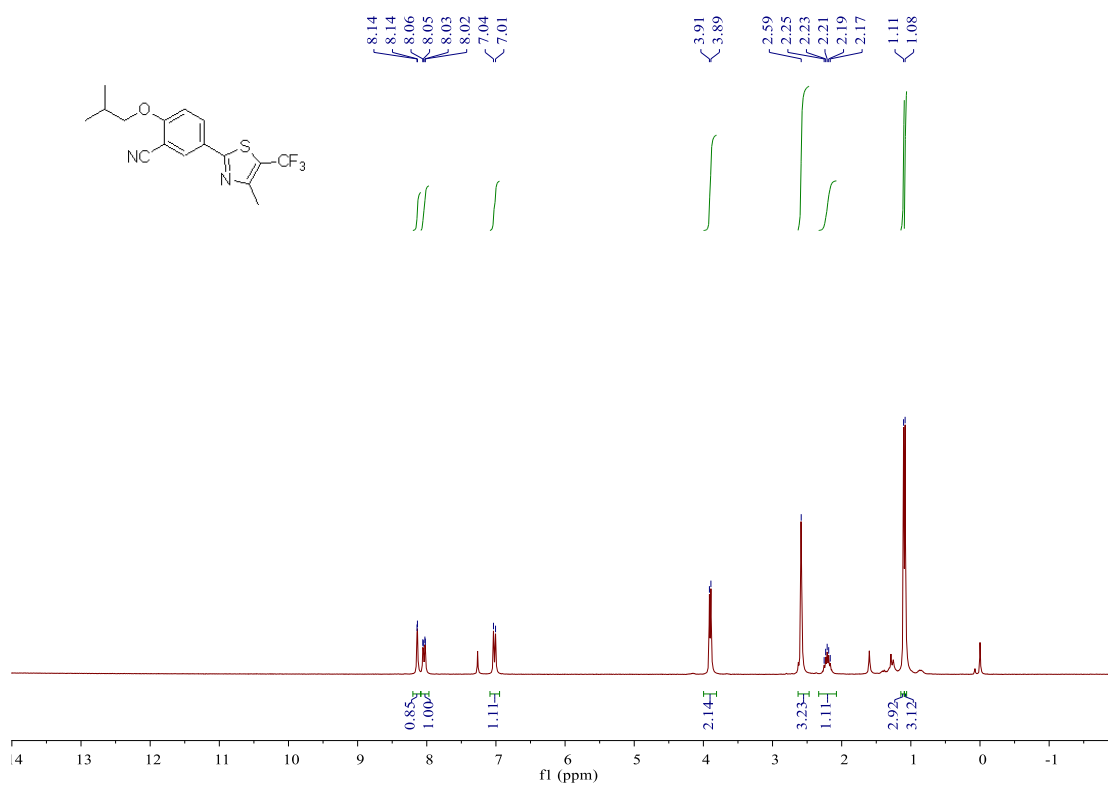

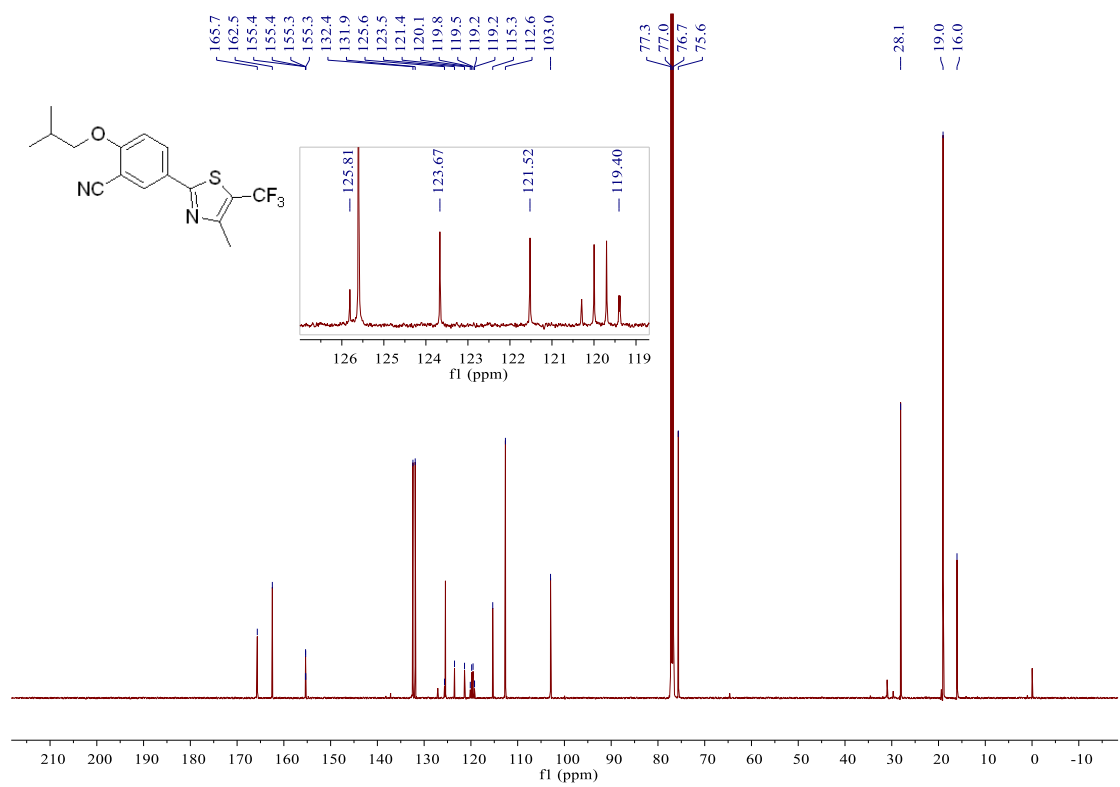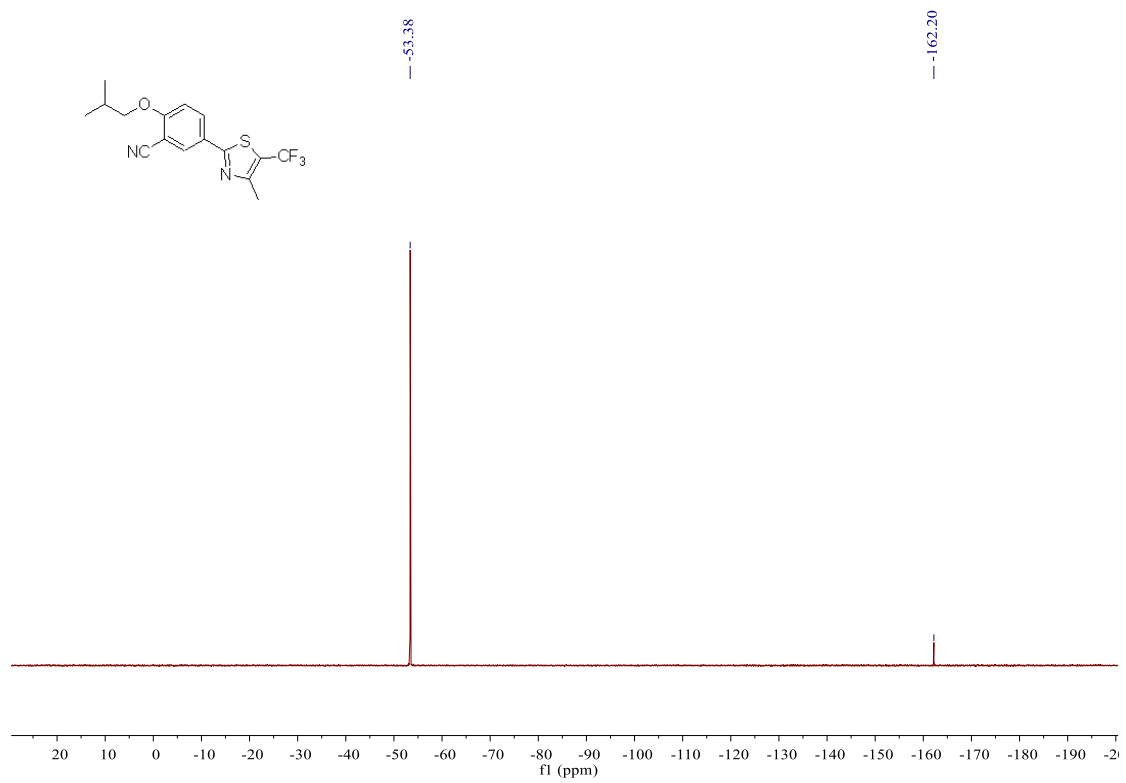



**3,5-Di-*tert*-butylbenzoyl fluoride (1j).**

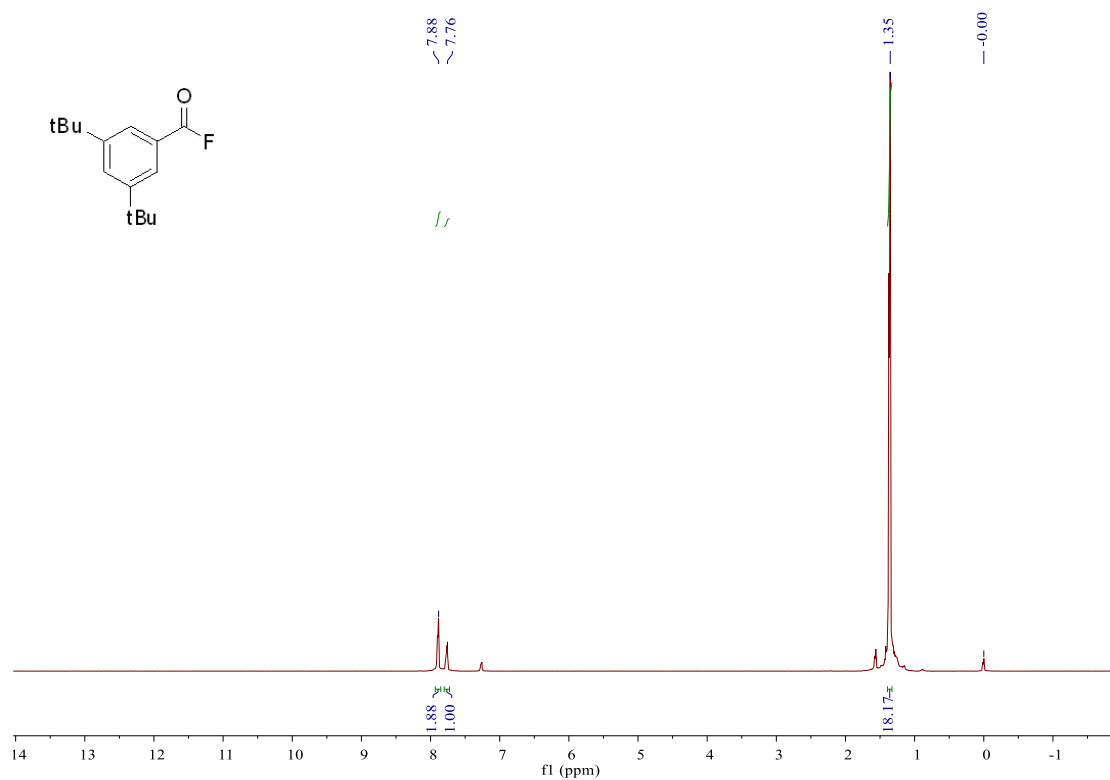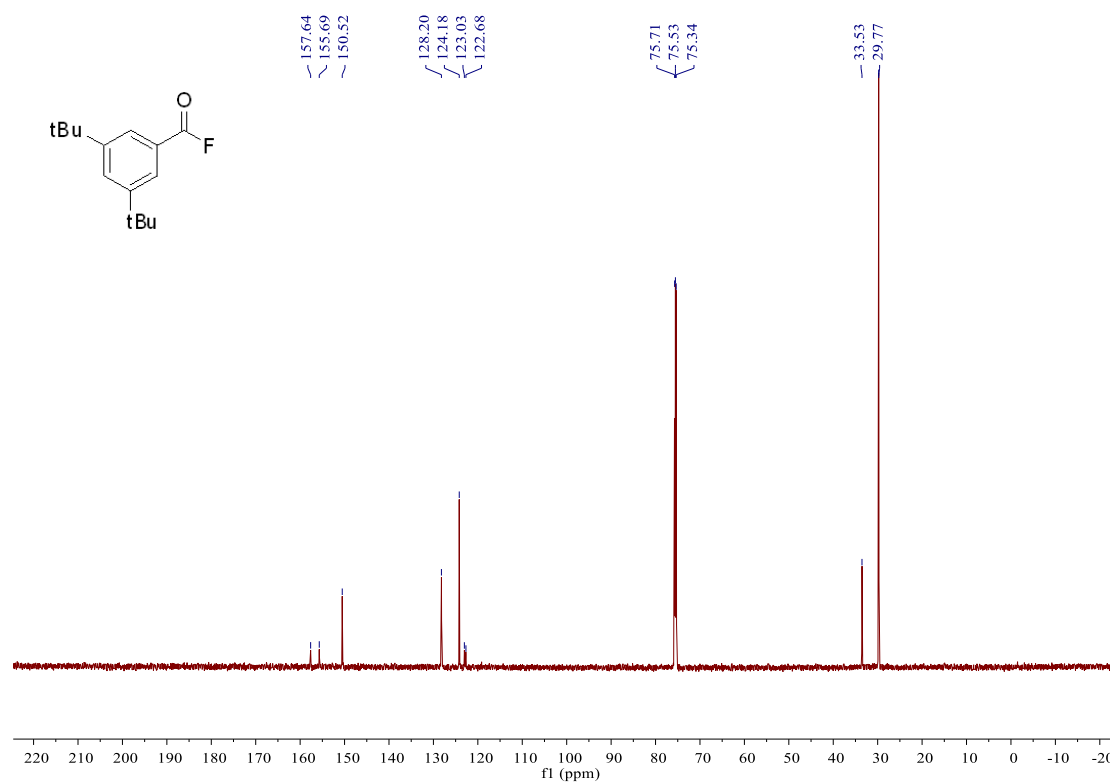

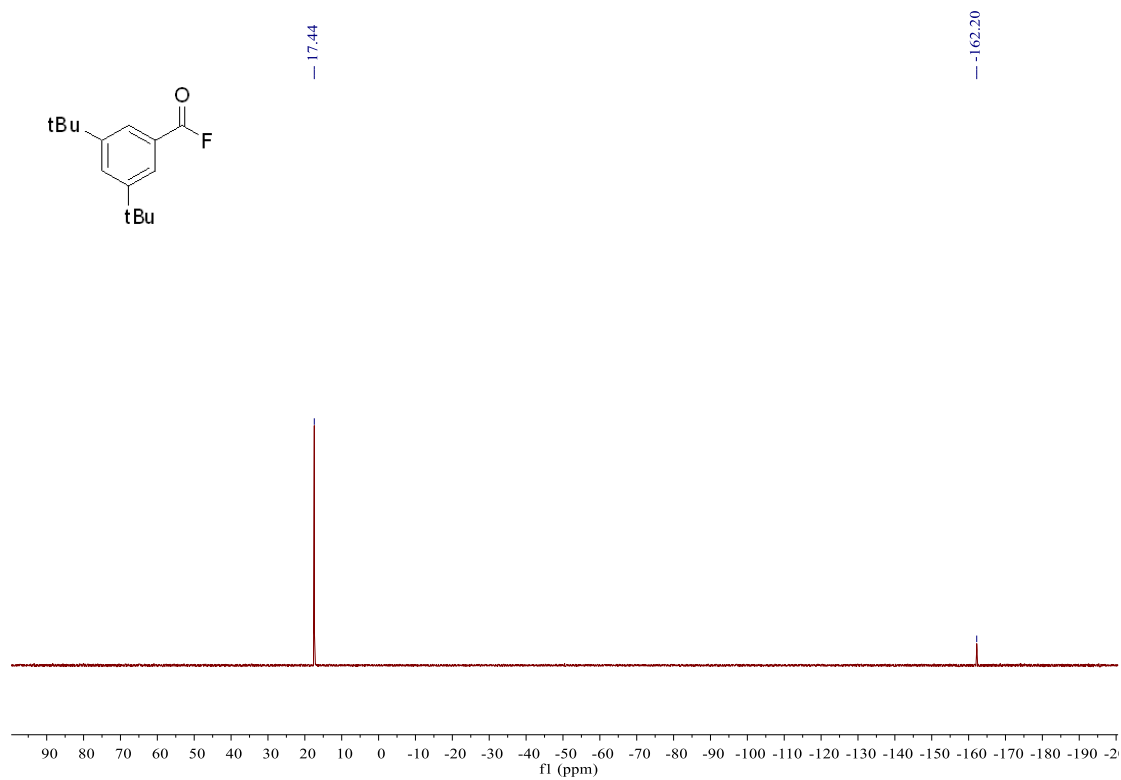

**4-bromo-3-methylbenzoyl fluoride (1k).**

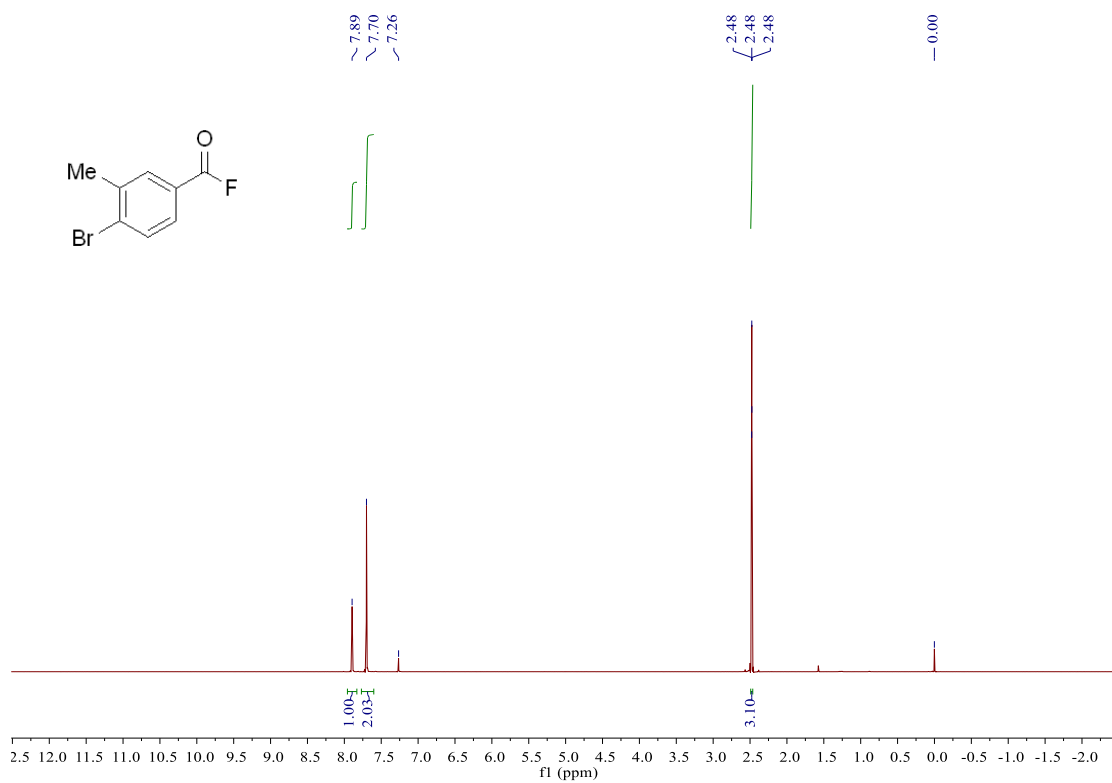

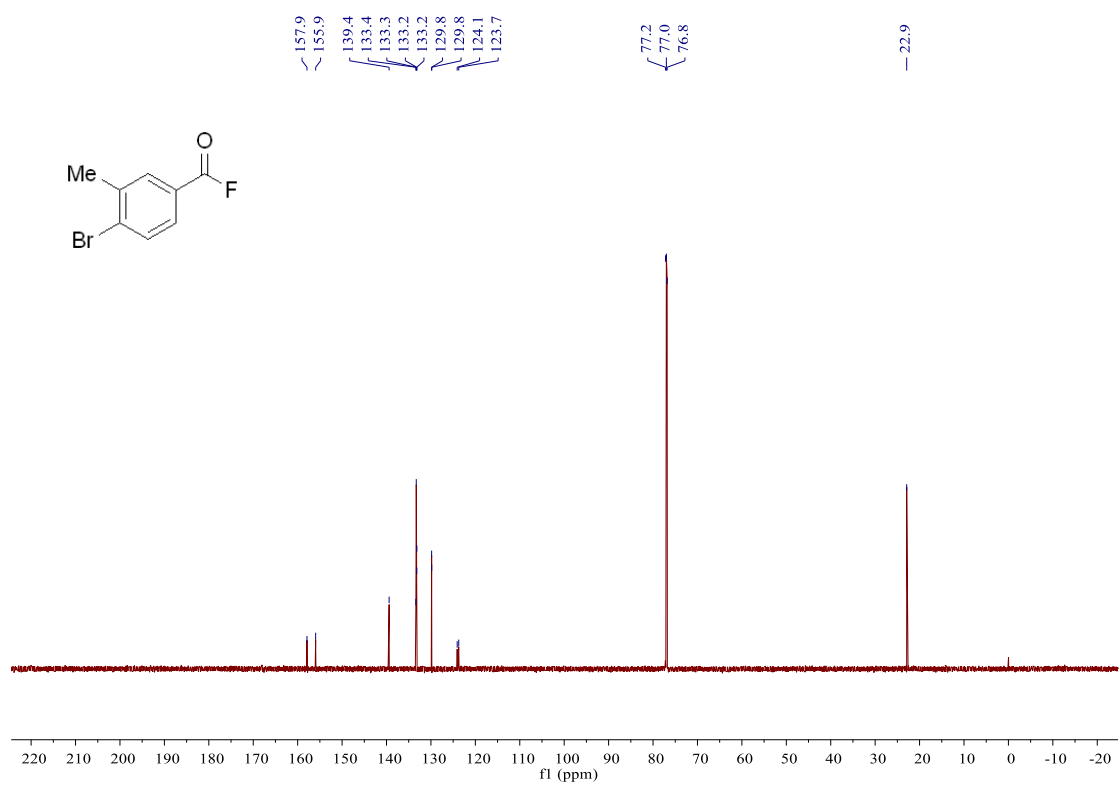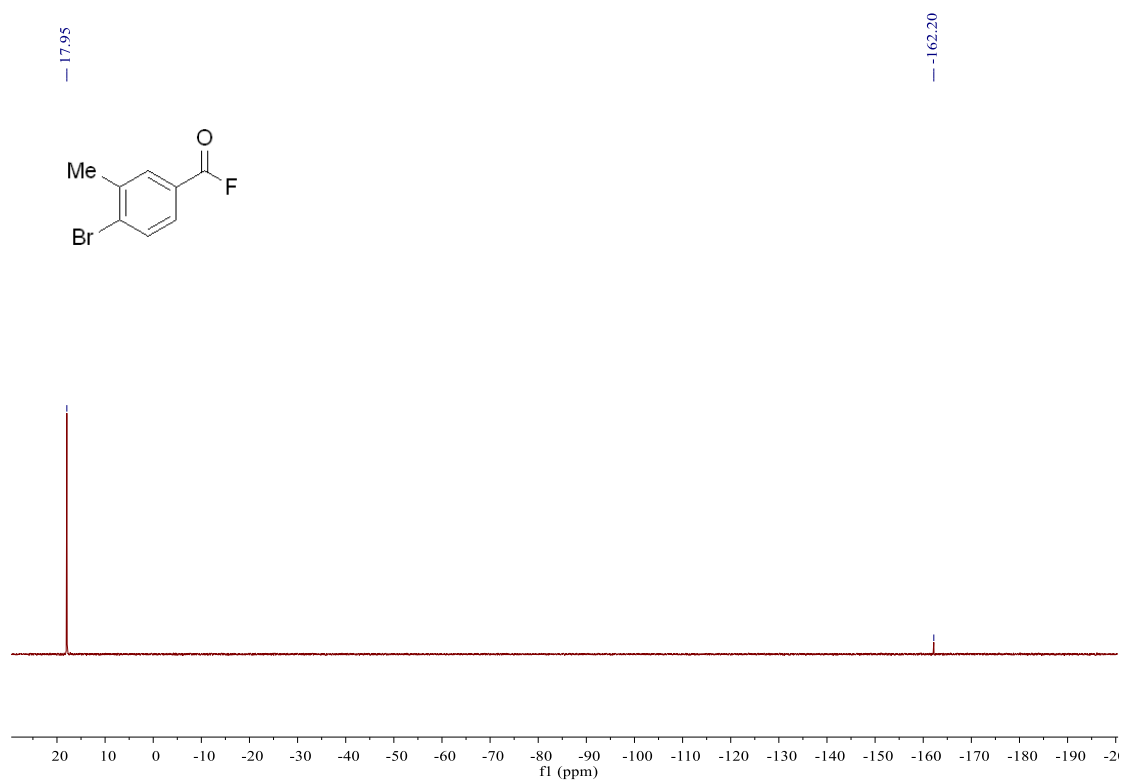

**3,4-diethoxybenzoyl fluoride (11).**

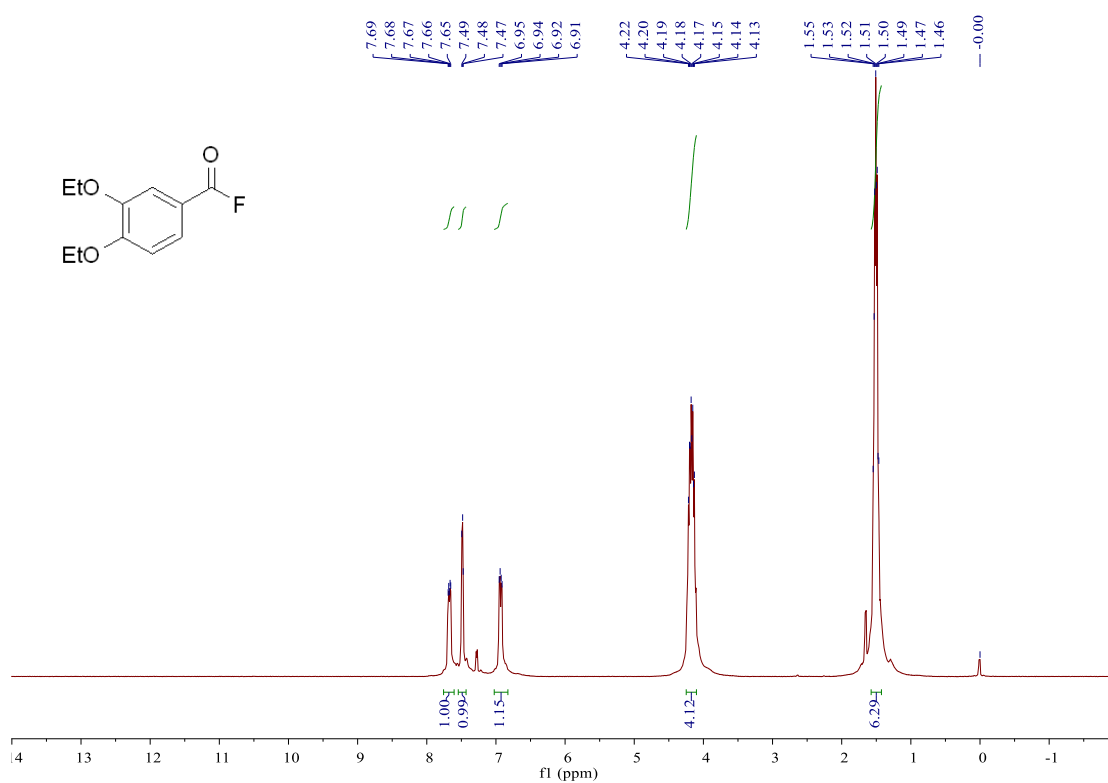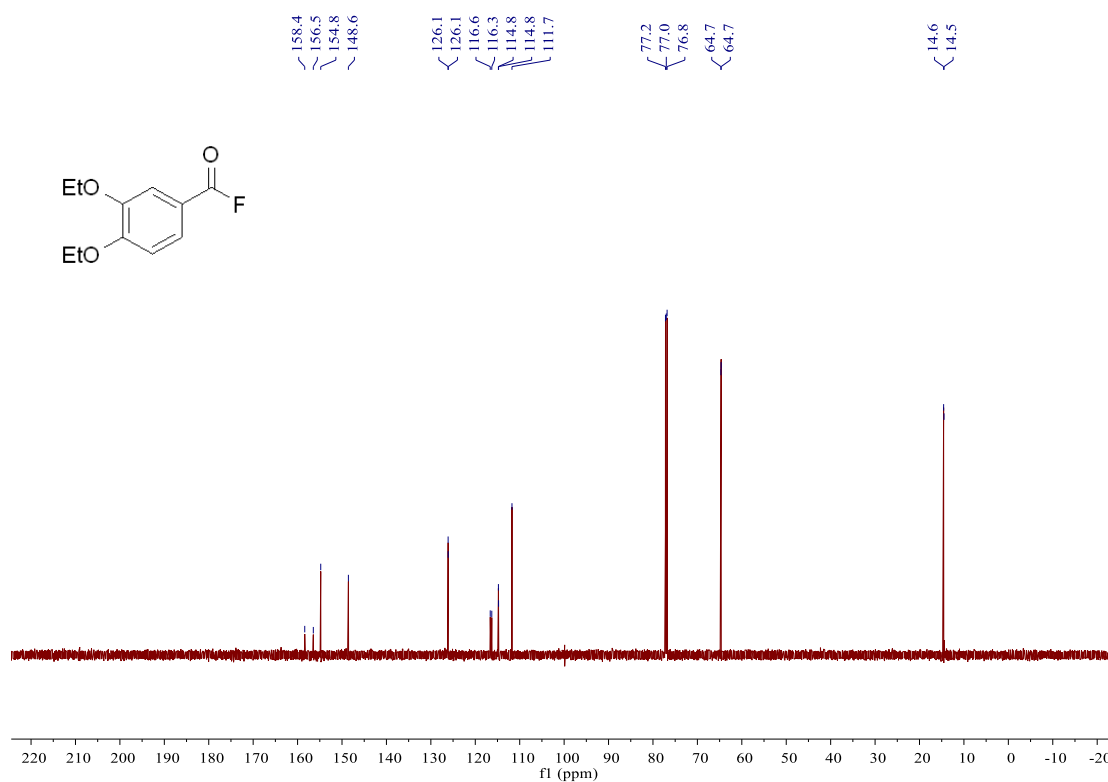

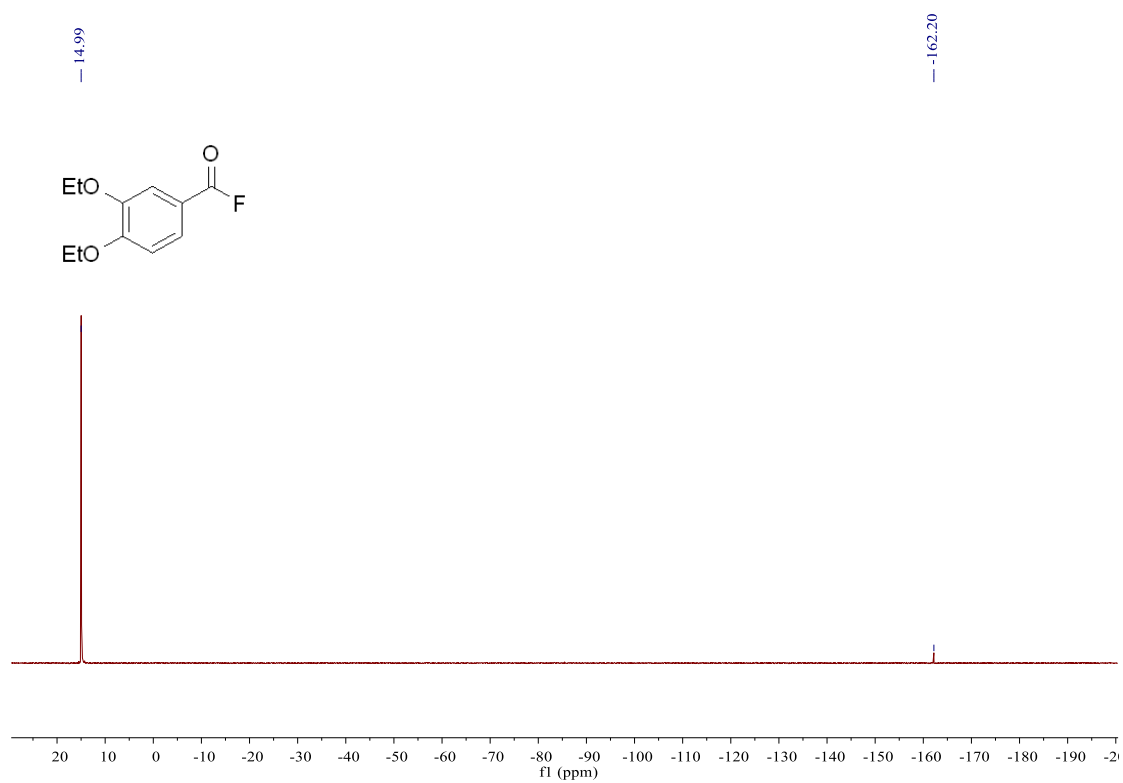

Supplement: Additional file 1 [file 1860-5397-16-254-S1.pdf]
